# Supplementary material for: The human cost of current and recommended diets in the U.S.
Source: Research Square preprint supplement (doi:10.21203/rs.3.rs-4999594/v1), 2024-09-27
Supplement: Supplementary file 2 [file fba99d8ae7f74d5fb5f874a9.xlsx]

## Sheet: Supp Table 1
FCID Code	FCID Description	Food Subgroup	FLR Score Commodity	FLR Score Value (g)	Rank
2201001500	Agave	added_sugar	Maple sugar and syrups	0.011	Min
9500219000	Maple syrup	added_sugar	Maple sugar and syrups	0.011	Min
9500186000	Honey	added_sugar	Honey, natural	0.1182	Max
600349000	Soybean, soy milk	dairy	Soybeans	0.0282353	Min
3600222000	Milk, fat	dairy	Milk, whole fresh cow	0.139051	Max
3600223000	Milk, nonfat solids	dairy	Milk, whole fresh cow	0.139051	Max
1003307000	Pummelo	fruit_exc_juice	Grapefruit (inc. pomelos)	0.0044	Min
2402020000	Avocado	fruit_exc_juice	Avocados	0.156465	Max
1307132000	Cranberry, juice	fruit_juice	Cranberries	0.00611	Min
2402290000	Pomegranate, juice	fruit_juice	Juice, fruit nes	0.3046	Max
1500120000	Corn, field, flour	gr_refined	Flour, maize	0.0035	Min
1500325000	Rice, flour	gr_refined	Flour, rice	0.134	Max
1500126000	Corn, pop	gr_whole	Maize	0.0007	Min
1500344000	Sorghum, grain	gr_whole	Sorghum	0.0007	Min
9500311000	Quinoa, grain	gr_whole	Quinoa	0.1219	Max
1800002000	Alfalfa, seed	leg_tot	Peas, dry	0.0024	Min
603256000	Pea, dry	leg_tot	Peas, dry	0.0024	Min
603258000	Pea, pigeon, seed	leg_tot	Peas, dry	0.0024	Min
602033000	Bean, cowpea, succulent	leg_tot	Beans, green	0.0444	Max
602037000	Bean, lima, succulent	leg_tot	Beans, green	0.0444	Max
1001108000	Citrus, oil	oil	Fruit, citrus nes	0.0059	Min
2001337000	Sesame, oil	oil	Sesame seed	0.822326	Max
7000145000	Egg, whole	pf_egg	Eggs, hen, in shell	0.027246	Min
7000146000	Egg, white	pf_egg	Eggs, liquid	0.101346	Max
7000147000	Egg, yolk	pf_egg	Eggs, liquid	0.101346	Max
1400278000	Pine nut	pf_ns	Pistachios	0.0082	Min
1400081000	Cashew	pf_ns	Cashew nuts, shelled	1.6224	Max
1400213000	Macadamia nut	pf_ns	Cashew nuts, shelled	1.6224	Max
5000383000	Turkey, liver	pf_poultry	Meat, turkey	0.0338	Min
5000382000	Turkey, meat	pf_poultry	Meat, turkey	0.0338	Min
5000384000	Turkey, meat byproducts	pf_poultry	Meat, turkey	0.0338	Min
5000386000	Turkey, skin	pf_poultry	Meat, turkey	0.0338	Min
4000094000	Chicken, liver	pf_poultry	Meat, chicken	0.0456	Max
4000093000	Chicken, meat	pf_poultry	Meat, chicken	0.0456	Max
4000095000	Chicken, meat byproducts	pf_poultry	Meat, chicken	0.0456	Max
4000097000	Chicken, skin	pf_poultry	Meat, chicken	0.0456	Max
3800221000	Meat, game	pf_redm	Meat, game	0.0316	Min
3900312000	Rabbit, meat	pf_redm	Meat, rabbit	0.2421	Max
5000385000	Turkey, fat	sat_fat	Meat, turkey	0.0338	Min
3100047000	Beef, fat	sat_fat	Meat, cattle, boneless	0.2417	Max
200332000	Salsify, tops	veg_dg	Carrots and turnips	0.0057	Min
2201019000	Asparagus	veg_dg	Asparagus	0.223398	Max
101250000	Parsley, turnip rooted	veg_oth	Carrots and turnips	0.0057	Min
101331000	Salsify, roots	veg_oth	Carrots and turnips	0.0057	Min
1902274000	Pepper, black and white	veg_oth	Pepper (piper spp.)	0.532	Max
103366000	Sweet potato	veg_ro	Sweet potatoes	0.002224	Min
802270000	Pepper, bell	veg_ro	Chillies and peppers, green	0.052948	Max
103299000	Potato, tuber, w/peel	veg_sta	Potatoes	0.0005	Min
103015000	Arrowroot, flour	veg_sta	Flour, roots and tubers nes	0.9436	Max

## Sheet: Supp Table 2.1
Feed Item	Data Source and/or Adaptation
Beans from soy	Soybean
By-product from oil production other than soy, cottonse	Weighted average from: Groundnut, Sunflower, Copra; based regional production share and applying extract rate for by-product oil
By-products from cottonseed	Cottonseed, applying extract rate for by-products
By-products from rape (canola)	Rapeseed,applying extract rate for by-products
By-products from soy	Rapeseed, applying extract rate for by-products
By-products from sugar beet	Sugarbeet, applying extract rate for by-products
Crop residue from leguminous plants cultivation	Weighted average from: Peas, Chick peas and Lentis; based regional production share and applying residues procedure
Crop residues from maize	Maize, applying residues procedure
Crop residues from millet	Millet, applying residues procedure
Crop residues from other grains	Weighted average from: Barley, Rye and Oat; based regional production share and applying residues procedure
Crop residues from rice	Rice, applying residues procedure
Crop residues from sorghum	Sorghum, applying residues procedure
Crop residues from sugarcane	Sugarcane, applying residues procedure
Crop residues from wheat	Wheat, applying residues procedure
Dry by-product from grain industries	Destiling products calculation
Fishmeal	Weighted average from: Demersal, fresh; Pelagic marine fish, fresh (Tuna); Pelagic marine fish, fresh (Excl. Tuna); Marine fish, nei; Crustaceus, fresh (shrimp); Crustaceus, fresh (Excluding shrimp); based regional production share
Fodder beet	Sugarbeet
Fresh grass	No values
Fresh mixture of grass and legumes	No values
Fruit from banana trees	Bananas
Grains	Weighted average from: Barley, Rye and Oat; based regional production share
Grains from barley (Hordeum vulgare)	Barley
Grains from maize (Zea mays)	Maize
Grains from millet	Millet
Grains from rice	Rice
Grains from sorghum	Sorghum
Grains from wheat (Triticum aestivum).	Wheat
Hay from adjacent areas	Hay
Hay or silage from alfalfa	Alfafa at 50% of share considering silage extract rate
Hay or silage from cultivated grass	Hay
Hay or silage from grass and legumes	Hay
Household food waste and other organic material used as feed	No values
Leaves from natural vegetation	No values
Leguminous beans	Weighted average from: Peas, Chick peas and Lentis; based regional production share
Limestone	No values
Maize	Maize
Maize gluten feed	Maize, applying extract rate for by-product Meals
Maize gluten meal	Maize, applying extract rate for by-product Meals
Molasses	Sugar cane, applying extract rate for by-product Molasses
Oil palm kernel expeller	Palm, kernel; applying extract rate for by-product oil
Pellets from cassava (Manihot esculenta) roots	Cassava, applying extract rate for by-product meals
Rapeseed	Rapeseed
Residual plant material such as stems from banana	Banana, applying residues procedure
Silage from whole grain plants	Weighted average from: Barley, Oat, Buckwheat, Fonio, Maize; based regional production share and applying silage calculation
Soy oil	Soybean, applying extract factors for by-product oil
Synthetic	No values
Wet by-product from grain industries	Destiling procedure

## Sheet: Supp Table 2.2
Subcategory	Subcategory (Gephart et al.)	Subcategory (MacLeod et al.)	Feed Type	FAO Name	Data Source and/or Adaptation
Soybean products	Soybean	Soybean, whole	Soybean whole	Soybeans	Soybean
Soybean products	Soybean	Soybean meal	Soybean meal	Soybeans	Soybean, applying extract rate for by-product meal
Soybean products	Soybean	Soybean oil	Soybean, oil	Soybeans	Soybean, applying extract rate for by-product oil
Oilseed products	Crops	Oilseed oil	Rapeseed oil	Rapeseed	Rapeseed, applying extract rate for by-product oil
Oilseed products	Crops	Oilseed meal	Rapeseed meal	Rapeseed	Rapeseed, applying extract rate for by-product meal
Oilseed products	Crops	Oilseed meal	Sunflower meal	Sunflower seed	Sunflower, applying extract rate for by-product meal
Oilseed products	Crops	Groundnuts by-products	Peanut meal	Groundnuts, with shell	Groundnuts, applying extract rate for by-product meal
Cereals products	Crops	Wheat	Wheat	Wheat	Wheat
Cereals products	Crops	Wheat flour	Wheat, flour	Wheat	Wheat, applying extract rate for flour
Cereals products	Crops	Wheat by-products	Wheat bran	Wheat	Wheat, applying extract rate for bran
Cereals products	Crops	Maize	Maize	Maize	Maize
Cereals products	Crops	Maize by-products	Maize, bran	Maize	Maize, applying extract rate for bran
Cereals products	Crops	Rice by-products	Rice bran	Rice, paddy	Rice, applying extract rate for bran
Other crops products	Crops	Cassava products	Cassava	Cassava	Cassava
Fish meal	FMFO	Fish meal	Demersal, meals	Demersal fish	Demersal fish, applying extract rate for meals
Fish meal	FMFO	Fish meal	Pelagic Meals (Excluding Tuna)	Pelagic fish	Pelagic, applying extract rate for meals
Fish oil	FMFO	Fish oil	Pelagic Body Oils (Excluding Tuna)	Pelagic fish	Pelagic, applying extract rate for oil
Animal products	Animal	Animal by-products	Chicken meal	Chickens	Chicken, applying extract rate for meals
Note: Depending on the source for feed estimation (Gephart et al., MacLeod et al.), the forced labor risk that is calculated for each feed type is agrgregated based on regional production share

## Sheet: Supp Table 3
			Consumed (g)					Inedible (g)					Wasted (g)					Total (Purchased) (g)
Food Subgroup	Inedible Coefficient1	Wasted Coefficient2	HUS	MED	VEG	PHD	CURRENT	HUS	MED	VEG	PHD	CURRENT	HUS	MED	VEG	PHD	CURRENT	HUS	MED	VEG	PHD	CURRENT
Vegetables
Dark-green vegetables	0.757338	0.381156	25.2857	25.2857	25.2857	80	19.8971	19.1498	19.1498	19.1498	60.587	15.0689	9.6378	9.6378	9.6378	30.4925	7.58391	54.0733	54.0733	54.0733	171.079	42.5499
Red and orange vegetables	0.262935	0.631865	113.143	113.143	113.143	80	54.1387	29.7493	29.7493	29.7493	21.0348	14.235	71.491	71.491	71.491	50.5492	34.2083	214.383	214.383	214.383	151.584	102.582
Starchy vegetables	2.24052	1.25048	95.7143	95.7143	95.7143	40	57.693	214.45	214.45	214.45	89.6208	129.262	119.689	119.689	119.689	50.0194	72.1441	429.853	429.853	429.853	179.64	259.099
Other vegetables	0.352033	0.62758	80	80	80	80	78.1356	28.1626	28.1626	28.1626	28.1626	27.5063	50.2064	50.2064	50.2064	50.2064	49.0363	158.369	158.369	158.369	158.369	154.678
Fruit
Whole fruits, excluding juice	0.813496	0.786745	234.08	291.84	234.08	120.8	107.044	190.423	237.411	190.423	98.2703	87.0798	184.161	229.604	184.161	95.0388	84.2162	608.664	758.854	608.664	314.109	278.34
100% fruit juice	0	0.141535	115.46	145.58	115.46	39.2	52.9389	0	0	0	0	0	16.3416	20.6047	16.3416	5.54817	7.4927	131.802	166.185	131.802	44.7482	60.4316
Grains
Whole grains	0.157734	0.244281	153	153	178.5	395.328	45.2542	24.1333	24.1333	28.1555	62.3566	7.13812	37.375	37.375	43.6041	96.571	11.0547	214.508	214.508	250.26	554.256	63.4471
Refined grains	0	0.290967	108	108	108	0	189.035	0	0	0	0	0	31.4244	31.4244	31.4244	0	55.0028	139.424	139.424	139.424	0	244.037
Dairy	0	0.302914	447	298	447	200	206.421	0	0	0	0	0	135.403	90.2683	135.403	60.5828	62.5278	582.403	388.268	582.403	260.583	268.949
Protein
Eggs	0.184615	0.353846	24	24	21.4286	10.4	29.8282	4.43077	4.43077	3.95604	1.92	5.50674	8.49231	8.49231	7.58242	3.68	10.5546	36.9231	36.9231	32.967	16	45.8895
Poultry	0	0.228105	42.34	42.34	0	23.2	53.101	0	0	0	0	0	9.65798	9.65798	0	5.29204	12.1126	51.998	51.998	0	28.492	65.2136
Red meat	0	0.306191	54.87	54.87	0	11.2	68.5024	0	0	0	0	0	16.8007	16.8007	0	3.42934	20.9748	71.6707	71.6707	0	14.6293	89.4773
Seafood	0	0.604553	33.1429	62.1429	0	22.4	17.7359	0	0	0	0	0	20.0366	37.5686	0	13.542	10.7223	53.1795	99.7115	0	35.942	28.4581
Nuts and seeds	0.0207037	0.136056	9.45	9.45	15	40	11.2152	0.19565	0.19565	0.310555	0.828148	0.232195	1.28573	1.28573	2.04084	5.44224	1.52589	10.9314	10.9314	17.3514	46.2704	12.9733
Legumes	0.0546362	0.22795	34.04	34.04	103.97	134.4	20.8895	1.85982	1.85982	5.68052	7.3431	1.14132	7.75942	7.75942	23.7	30.6365	4.76177	43.6592	43.6592	133.35	172.38	26.7926
Added Fats and Sugar
Unsaturated fat (oil)	0	0.197487	27	27	27	32	27.5782	0	0	0	0	0	5.33216	5.33216	5.33216	6.3196	5.44635	32.3322	32.3322	32.3322	38.3196	33.0245
Saturated fat	0	0.452717	13.3333	13.3333	13.8889	9.44	25.9588	0	0	0	0	0	6.03623	6.03623	6.28774	4.27365	11.752	19.3696	19.3696	20.1766	13.7137	37.7107
Added sugar	0	0.508872	30	30	31.25	24.8	63.6162	0	0	0	0	0	15.2661	15.2661	15.9022	12.62	32.3725	45.2661	45.2661	47.1522	37.42	95.9886
1 Inedible Coefficient = Inedible Food Amount / Consumed Food Amount
2 Wasted Coefficient = Wasted Food Amount / Consumed Food Amount

## Sheet: Supp Table 4
cgn	CG_Subgroup	FCID Code	FCID Description	GL1	GL2	GL3	Food Subgroup
22	22A	2201001500	Agave	Sugar substitutes	Sugars	Snacks and sweets	added_sugar
1	1A	101052000	Beet, sugar	Sugars and honey	Sugars	Snacks and sweets	added_sugar
1	1A	101053000	Beet, sugar, molasses	Sugars and honey	Sugars	Snacks and sweets	added_sugar
15	15	1500124000	Corn, field, syrup	Jams, syrups and toppings	Sugars	Sugars	added_sugar
95	O	9500186000	Honey	Sugars and honey	Sugars	Snacks and sweets	added_sugar
95	O	9500219000	Maple syrup	Jams, syrups and toppings	Sugars	Sugars	added_sugar
95	O	9500218000	Maple, sugar	Sugars and honey	Sugars	Snacks and sweets	added_sugar
15	15	1500345000	Sorghum, syrup	Jams, syrups and toppings	Sugars	Sugars	added_sugar
95	O	9500363000	Sugarcane, molasses	Sugars and honey	Sugars	Snacks and sweets	added_sugar
95	O	9500362000	Sugarcane, sugar	Sugars and honey	Sugars	Snacks and sweets	added_sugar
14	14	1400003001	Almond-babyfood	Baby foods	Baby foods	Baby foods	babyfood
14	14	1400004001	Almond, oil-babyfood	Baby foods	Baby foods	Baby foods	babyfood
11	11	1100009001	Apple, dried-babyfood	Baby foods	Baby foods	Baby foods	babyfood
11	11	1100010001	Apple, juice-babyfood	Baby foods	Baby foods	Baby foods	babyfood
11	11	1100008001	Apple, peeled fruit-babyfood	Baby foods	Baby foods	Baby foods	babyfood
11	11	1100011001	Apple, sauce-babyfood	Baby foods	Baby foods	Baby foods	babyfood
12	12B	1202012001	Apricot-babyfood	Baby foods	Baby foods	Baby foods	babyfood
12	12B	1202014001	Apricot, juice-babyfood	Baby foods	Baby foods	Baby foods	babyfood
1	1CD	103015001	Arrowroot, flour-babyfood	Baby foods	Baby foods	Baby foods	babyfood
24	24B	2402023001	Banana-babyfood	Baby foods	Baby foods	Baby foods	babyfood
24	24B	2402024001	Banana, dried-babyfood	Baby foods	Baby foods	Baby foods	babyfood
15	15	1500026001	Barley, flour-babyfood	Baby foods	Baby foods	Baby foods	babyfood
15	15	1500025001	Barley, pearled barley-babyfood	Baby foods	Baby foods	Baby foods	babyfood
19	19A	1901029001	Basil, dried leaves-babyfood	Baby foods	Baby foods	Baby foods	babyfood
19	19A	1901028001	Basil, fresh leaves-babyfood	Baby foods	Baby foods	Baby foods	babyfood
6	6A	601043001	Bean, snap, succulent-babyfood	Baby foods	Baby foods	Baby foods	babyfood
31	31	3100047001	Beef, fat-babyfood	Baby foods	Baby foods	Baby foods	babyfood
31	31	3100049001	Beef, liver-babyfood	Baby foods	Baby foods	Baby foods	babyfood
31	31	3100046001	Beef, meat byproducts-babyfood	Baby foods	Baby foods	Baby foods	babyfood
31	31	3100044001	Beef, meat-babyfood	Baby foods	Baby foods	Baby foods	babyfood
1	1AB	101050001	Beet, garden, roots-babyfood	Baby foods	Baby foods	Baby foods	babyfood
1	1A	101052001	Beet, sugar-babyfood	Baby foods	Baby foods	Baby foods	babyfood
1	1A	101053001	Beet, sugar, molasses-babyfood	Baby foods	Baby foods	Baby foods	babyfood
13	13A	1301056001	Blackberry, juice-babyfood	Baby foods	Baby foods	Baby foods	babyfood
13	13B	1302057001	Blueberry-babyfood	Baby foods	Baby foods	Baby foods	babyfood
5	5	500061001	Broccoli-babyfood	Baby foods	Baby foods	Baby foods	babyfood
1	1AB	101078001	Carrot-babyfood	Baby foods	Baby foods	Baby foods	babyfood
1	1CD	103082001	Cassava-babyfood	Baby foods	Baby foods	Baby foods	babyfood
22	22B	2202085001	Celery-babyfood	Baby foods	Baby foods	Baby foods	babyfood
12	12A	1201090001	Cherry-babyfood	Baby foods	Baby foods	Baby foods	babyfood
12	12A	1201091001	Cherry, juice-babyfood	Baby foods	Baby foods	Baby foods	babyfood
40	40	4000096001	Chicken, fat-babyfood	Baby foods	Baby foods	Baby foods	babyfood
40	40	4000095001	Chicken, meat byproducts-babyfood	Baby foods	Baby foods	Baby foods	babyfood
40	40	4000093001	Chicken, meat-babyfood	Baby foods	Baby foods	Baby foods	babyfood
40	40	4000097001	Chicken, skin-babyfood	Baby foods	Baby foods	Baby foods	babyfood
6	6C	603098001	Chickpea, seed-babyfood	Baby foods	Baby foods	Baby foods	babyfood
4	4A	401118001	Cilantro, leaves-babyfood	Baby foods	Baby foods	Baby foods	babyfood
19	19B	1902105001	Cinnamon-babyfood	Baby foods	Baby foods	Baby foods	babyfood
14	14	1400111001	Coconut, meat-babyfood	Baby foods	Baby foods	Baby foods	babyfood
14	14	1400114001	Coconut, oil-babyfood	Baby foods	Baby foods	Baby foods	babyfood
19	19B	1902119001	Coriander, seed-babyfood	Baby foods	Baby foods	Baby foods	babyfood
15	15	1500120001	Corn, field, flour-babyfood	Baby foods	Baby foods	Baby foods	babyfood
15	15	1500121001	Corn, field, meal-babyfood	Baby foods	Baby foods	Baby foods	babyfood
15	15	1500125001	Corn, field, oil-babyfood	Baby foods	Baby foods	Baby foods	babyfood
15	15	1500123001	Corn, field, starch-babyfood	Baby foods	Baby foods	Baby foods	babyfood
15	15	1500124001	Corn, field, syrup-babyfood	Baby foods	Baby foods	Baby foods	babyfood
15	15	1500127001	Corn, sweet-babyfood	Baby foods	Baby foods	Baby foods	babyfood
20	20C	2003128001	Cottonseed, oil-babyfood	Baby foods	Baby foods	Baby foods	babyfood
13	13GH	1307130001	Cranberry-babyfood	Baby foods	Baby foods	Baby foods	babyfood
13	13GH	1307132001	Cranberry, juice-babyfood	Baby foods	Baby foods	Baby foods	babyfood
70	70	7000146001	Egg, white (solids)-babyfood	Baby foods	Baby foods	Baby foods	babyfood
70	70	7000145001	Egg, whole-babyfood	Baby foods	Baby foods	Baby foods	babyfood
70	70	7000147001	Egg, yolk-babyfood	Baby foods	Baby foods	Baby foods	babyfood
3	3A	301165001	Garlic, bulb-babyfood	Baby foods	Baby foods	Baby foods	babyfood
1	1CD	103166001	Ginger-babyfood	Baby foods	Baby foods	Baby foods	babyfood
13	13DF	1304176001	Grape, juice-babyfood	Baby foods	Baby foods	Baby foods	babyfood
6	6C	603182001	Guar, seed-babyfood	Baby foods	Baby foods	Baby foods	babyfood
23	23B	2302183001	Guava-babyfood	Baby foods	Baby foods	Baby foods	babyfood
19	19A	1901184001	Herbs, other-babyfood	Baby foods	Baby foods	Baby foods	babyfood
95	O	9500186001	Honey-babyfood	Baby foods	Baby foods	Baby foods	babyfood
10	10B	1002200001	Lemon, juice-babyfood	Baby foods	Baby foods	Baby foods	babyfood
10	10B	1002207001	Lime, juice-babyfood	Baby foods	Baby foods	Baby foods	babyfood
24	24B	2402215001	Mango-babyfood	Baby foods	Baby foods	Baby foods	babyfood
24	24B	2402217001	Mango, juice-babyfood	Baby foods	Baby foods	Baby foods	babyfood
19	19A	1901220001	Marjoram-babyfood	Baby foods	Baby foods	Baby foods	babyfood
36	36	3600222001	Milk, fat-baby food/infant formula	Baby foods	Baby foods	Baby foods	babyfood
37	37	3700222501	Milk, human	Baby foods	Baby foods	Baby foods	babyfood
36	36	3600223001	Milk, nonfat solids-baby food/infant formula	Baby foods	Baby foods	Baby foods	babyfood
36	36	3600225001	Milk, sugar (lactose)-baby food/infant formula	Baby foods	Baby foods	Baby foods	babyfood
36	36	3600224001	Milk, water-babyfood/infant formula	Baby foods	Baby foods	Baby foods	babyfood
15	15	1500232001	Oat, flour-babyfood	Baby foods	Baby foods	Baby foods	babyfood
15	15	1500233001	Oat, groats/rolled oats-babyfood	Baby foods	Baby foods	Baby foods	babyfood
3	3A	301237001	Onion, bulb-babyfood	Baby foods	Baby foods	Baby foods	babyfood
3	3A	301238001	Onion, bulb, dried-babyfood	Baby foods	Baby foods	Baby foods	babyfood
10	10A	1001241001	Orange, juice-babyfood	Baby foods	Baby foods	Baby foods	babyfood
95	O	9500244001	Palm, oil-babyfood	Baby foods	Baby foods	Baby foods	babyfood
24	24B	2402245001	Papaya-babyfood	Baby foods	Baby foods	Baby foods	babyfood
19	19A	1901249001	Parsley, dried leaves-babyfood	Baby foods	Baby foods	Baby foods	babyfood
1	1AB	101251001	Parsnip-babyfood	Baby foods	Baby foods	Baby foods	babyfood
24	24E	2405252001	Passionfruit-babyfood	Baby foods	Baby foods	Baby foods	babyfood
24	24E	2405253001	Passionfruit, juice-babyfood	Baby foods	Baby foods	Baby foods	babyfood
6	6C	603256001	Pea, dry-babyfood	Baby foods	Baby foods	Baby foods	babyfood
6	6B	602255001	Pea, succulent-babyfood	Baby foods	Baby foods	Baby foods	babyfood
12	12B	1202260001	Peach-babyfood	Baby foods	Baby foods	Baby foods	babyfood
12	12B	1202261001	Peach, dried-babyfood	Baby foods	Baby foods	Baby foods	babyfood
12	12B	1202262001	Peach, juice-babyfood	Baby foods	Baby foods	Baby foods	babyfood
11	11	1100266001	Pear-babyfood	Baby foods	Baby foods	Baby foods	babyfood
11	11	1100268001	Pear, juice-babyfood	Baby foods	Baby foods	Baby foods	babyfood
8	8B	802270001	Pepper, bell-babyfood	Baby foods	Baby foods	Baby foods	babyfood
8	8B	802271001	Pepper, bell, dried-babyfood	Baby foods	Baby foods	Baby foods	babyfood
19	19B	1902274001	Pepper, black and white-babyfood	Baby foods	Baby foods	Baby foods	babyfood
8	8BC	802272001	Pepper, nonbell-babyfood	Baby foods	Baby foods	Baby foods	babyfood
24	24C	2403279001	Pineapple-babyfood	Baby foods	Baby foods	Baby foods	babyfood
24	24C	2403281001	Pineapple, juice-babyfood	Baby foods	Baby foods	Baby foods	babyfood
12	12C	1203285001	Plum-babyfood	Baby foods	Baby foods	Baby foods	babyfood
12	12C	1203287001	Plum, prune, dried-babyfood	Baby foods	Baby foods	Baby foods	babyfood
12	12C	1203286001	Plum, prune, fresh-babyfood	Baby foods	Baby foods	Baby foods	babyfood
12	12C	1203288001	Plum, prune, juice-babyfood	Baby foods	Baby foods	Baby foods	babyfood
34	34	3400293001	Pork, fat-babyfood	Baby foods	Baby foods	Baby foods	babyfood
34	34	3400292001	Pork, meat byproducts-babyfood	Baby foods	Baby foods	Baby foods	babyfood
34	34	3400290001	Pork, meat-babyfood	Baby foods	Baby foods	Baby foods	babyfood
1	1C	103297001	Potato, dry (granules/ flakes)-babyfood	Baby foods	Baby foods	Baby foods	babyfood
1	1C	103298001	Potato, flour-babyfood	Baby foods	Baby foods	Baby foods	babyfood
1	1C	103300001	Potato, tuber, w/o peel-babyfood	Baby foods	Baby foods	Baby foods	babyfood
1	1C	103299001	Potato, tuber, w/peel-babyfood	Baby foods	Baby foods	Baby foods	babyfood
20	20A	2001319001	Rapeseed, oil-babyfood	Baby foods	Baby foods	Baby foods	babyfood
13	13A	1301320001	Raspberry-babyfood	Baby foods	Baby foods	Baby foods	babyfood
13	13A	1301321001	Raspberry, juice-babyfood	Baby foods	Baby foods	Baby foods	babyfood
15	15	1500326001	Rice, bran-babyfood	Baby foods	Baby foods	Baby foods	babyfood
15	15	1500324001	Rice, brown-babyfood	Baby foods	Baby foods	Baby foods	babyfood
15	15	1500325001	Rice, flour-babyfood	Baby foods	Baby foods	Baby foods	babyfood
15	15	1500323001	Rice, white-babyfood	Baby foods	Baby foods	Baby foods	babyfood
20	20B	2002330001	Safflower, oil-babyfood	Baby foods	Baby foods	Baby foods	babyfood
95	O	9500335001	Seaweed-babyfood	Baby foods	Baby foods	Baby foods	babyfood
20	20A	2001337001	Sesame, oil-babyfood	Baby foods	Baby foods	Baby foods	babyfood
20	20A	2001336001	Sesame, seed-babyfood	Baby foods	Baby foods	Baby foods	babyfood
35	35	3500341001	Sheep, fat-babyfood	Baby foods	Baby foods	Baby foods	babyfood
35	35	3500339001	Sheep, meat-babyfood	Baby foods	Baby foods	Baby foods	babyfood
6	6	600348001	Soybean, flour-babyfood	Baby foods	Baby foods	Baby foods	babyfood
6	6	600350001	Soybean, oil-babyfood	Baby foods	Baby foods	Baby foods	babyfood
6	6	600349001	Soybean, soy milk-babyfood or infant formula	Baby foods	Baby foods	Baby foods	babyfood
19	19B	1902354001	Spices, other-babyfood	Baby foods	Baby foods	Baby foods	babyfood
4	4A	401355001	Spinach-babyfood	Baby foods	Baby foods	Baby foods	babyfood
9	9B	902356001	Squash, summer-babyfood	Baby foods	Baby foods	Baby foods	babyfood
9	9B	902357001	Squash, winter-babyfood	Baby foods	Baby foods	Baby foods	babyfood
13	13G	1307359001	Strawberry-babyfood	Baby foods	Baby foods	Baby foods	babyfood
13	13G	1307360001	Strawberry, juice-babyfood	Baby foods	Baby foods	Baby foods	babyfood
95	O	9500363001	Sugarcane, molasses-babyfood	Baby foods	Baby foods	Baby foods	babyfood
95	O	9500362001	Sugarcane, sugar-babyfood	Baby foods	Baby foods	Baby foods	babyfood
20	20B	2002365001	Sunflower, oil-babyfood	Baby foods	Baby foods	Baby foods	babyfood
1	1CD	103366001	Sweet potato-babyfood	Baby foods	Baby foods	Baby foods	babyfood
8	8A	801375001	Tomato-babyfood	Baby foods	Baby foods	Baby foods	babyfood
8	8A	801378001	Tomato, dried-babyfood	Baby foods	Baby foods	Baby foods	babyfood
8	8A	801376001	Tomato, paste-babyfood	Baby foods	Baby foods	Baby foods	babyfood
8	8A	801377001	Tomato, puree-babyfood	Baby foods	Baby foods	Baby foods	babyfood
15	15	1500381001	Triticale, flour-babyfood	Baby foods	Baby foods	Baby foods	babyfood
50	50	5000385001	Turkey, fat-babyfood	Baby foods	Baby foods	Baby foods	babyfood
50	50	5000383001	Turkey, liver-babyfood	Baby foods	Baby foods	Baby foods	babyfood
50	50	5000384001	Turkey, meat byproducts-babyfood	Baby foods	Baby foods	Baby foods	babyfood
50	50	5000382001	Turkey, meat-babyfood	Baby foods	Baby foods	Baby foods	babyfood
50	50	5000386001	Turkey, skin-babyfood	Baby foods	Baby foods	Baby foods	babyfood
15	15	1500402001	Wheat, flour-babyfood	Baby foods	Baby foods	Baby foods	babyfood
15	15	1500401001	Wheat, grain-babyfood	Baby foods	Baby foods	Baby foods	babyfood
95	O	9500116000	Coffee, instant	Coffee	Coffee/Tea	Coffee/Tea	coffee_tea
95	O	9500115000	Coffee, roasted bean	Coffee	Coffee/Tea	Coffee/Tea	coffee_tea
95	O	9500372000	Tea, dried	Tea	Coffee/Tea	Coffee/Tea	coffee_tea
95	O	9500373000	Tea, instant	Tea	Coffee/Tea	Coffee/Tea	coffee_tea
36	36	3600223000	Milk, nonfat solids	Milk	Milk	Dairy	dairy_cow
36	36	3600224000	Milk, water	Milk	Milk	Dairy	dairy_cow
6	6	600349000	Soybean, soy milk	Milk Alternative	Milk Alternatives	Dairy substitutes	dairy_soy
23	23C	2303000500	Acai berry	Whole Fruit	Whole Fruit	Whole Fruit	fruit_exc_juice
23	23A	2301001000	Acerola	Whole Fruit	Whole Fruit	Whole Fruit	fruit_exc_juice
11	11	1100009000	Apple, dried	Dried Fruit	Whole Fruit	Whole Fruit	fruit_exc_juice
11	11	1100007000	Apple, fruit with peel	Whole Fruit	Whole Fruit	Whole Fruit	fruit_exc_juice
11	11	1100008000	Apple, peeled fruit	Whole Fruit	Whole Fruit	Whole Fruit	fruit_exc_juice
11	11	1100011000	Apple, sauce	Whole Fruit	Whole Fruit	Whole Fruit	fruit_exc_juice
12	12B	1202012000	Apricot	Whole Fruit	Whole Fruit	Whole Fruit	fruit_exc_juice
12	12B	1202013000	Apricot, dried	Dried Fruit	Whole Fruit	Whole Fruit	fruit_exc_juice
24	24C	2401019500	Atemoya	Whole Fruit	Whole Fruit	Whole Fruit	fruit_exc_juice
24	24B	2402020000	Avocado	Whole Fruit	Whole Fruit	Whole Fruit	fruit_exc_juice
9	9B	902021000	Balsam pear	Whole Fruit	Whole Fruit	Whole Fruit	fruit_exc_juice
24	24B	2402023000	Banana	Whole Fruit	Whole Fruit	Whole Fruit	fruit_exc_juice
24	24B	2402024000	Banana, dried	Dried Fruit	Whole Fruit	Whole Fruit	fruit_exc_juice
13	13A	1301055000	Blackberry	Whole Fruit	Whole Fruit	Whole Fruit	fruit_exc_juice
13	13B	1302057000	Blueberry	Whole Fruit	Whole Fruit	Whole Fruit	fruit_exc_juice
13	13A	1301058000	Boysenberry	Whole Fruit	Whole Fruit	Whole Fruit	fruit_exc_juice
24	24C	2403060000	Breadfruit	Whole Fruit	Whole Fruit	Whole Fruit	fruit_exc_juice
24	24A	2401074000	Canistel	Whole Fruit	Whole Fruit	Whole Fruit	fruit_exc_juice
9	9A	901075000	Cantaloupe	Whole Fruit	Whole Fruit	Whole Fruit	fruit_exc_juice
9	9B	902088000	Chayote, fruit	Whole Fruit	Whole Fruit	Whole Fruit	fruit_exc_juice
24	24C	2403089000	Cherimoya	Whole Fruit	Whole Fruit	Whole Fruit	fruit_exc_juice
12	12A	1201090000	Cherry	Whole Fruit	Whole Fruit	Whole Fruit	fruit_exc_juice
10	10A	1001106000	Citron	Whole Fruit	Whole Fruit	Whole Fruit	fruit_exc_juice
10	10A	1001107000	Citrus hybrids	Whole Fruit	Whole Fruit	Whole Fruit	fruit_exc_juice
14	14	1400112000	Coconut, dried	Dried Fruit	Whole Fruit	Whole Fruit	fruit_exc_juice
14	14	1400111000	Coconut, meat	Whole Fruit	Whole Fruit	Whole Fruit	fruit_exc_juice
11	11	1100129000	Crabapple	Whole Fruit	Whole Fruit	Whole Fruit	fruit_exc_juice
13	13GH	1307130000	Cranberry	Whole Fruit	Whole Fruit	Whole Fruit	fruit_exc_juice
13	13GH	1307131000	Cranberry, dried	Dried Fruit	Whole Fruit	Whole Fruit	fruit_exc_juice
13	13B	1302136000	Currant	Whole Fruit	Whole Fruit	Whole Fruit	fruit_exc_juice
13	13B	1302137000	Currant, dried	Dried Fruit	Whole Fruit	Whole Fruit	fruit_exc_juice
23	23C	2303141000	Date	Whole Fruit	Whole Fruit	Whole Fruit	fruit_exc_juice
24	24D	2404050206	Dragon fruit	Whole Fruit	Whole Fruit	Whole Fruit	fruit_exc_juice
13	13BC	1302149000	Elderberry	Whole Fruit	Whole Fruit	Whole Fruit	fruit_exc_juice
23	23B	2303151000	Feijoa	Whole Fruit	Whole Fruit	Whole Fruit	fruit_exc_juice
23	23B	2302153000	Fig	Whole Fruit	Whole Fruit	Whole Fruit	fruit_exc_juice
23	23B	2302154000	Fig, dried	Dried Fruit	Whole Fruit	Whole Fruit	fruit_exc_juice
8	8	801173500	Goji berry	Whole Fruit	Whole Fruit	Whole Fruit	fruit_exc_juice
13	13BDEF	1302174000	Gooseberry	Whole Fruit	Whole Fruit	Whole Fruit	fruit_exc_juice
13	13DF	1304175000	Grape	Whole Fruit	Whole Fruit	Whole Fruit	fruit_exc_juice
13	13DF	1304178000	Grape, raisin	Dried Fruit	Whole Fruit	Whole Fruit	fruit_exc_juice
10	10C	1003180000	Grapefruit	Whole Fruit	Whole Fruit	Whole Fruit	fruit_exc_juice
23	23B	2302183000	Guava	Whole Fruit	Whole Fruit	Whole Fruit	fruit_exc_juice
9	9A	901187000	Honeydew melon	Whole Fruit	Whole Fruit	Whole Fruit	fruit_exc_juice
13	13B	1302191000	Huckleberry	Whole Fruit	Whole Fruit	Whole Fruit	fruit_exc_juice
24	24C	2403193000	Jackfruit	Whole Fruit	Whole Fruit	Whole Fruit	fruit_exc_juice
13	13DE	1304195000	Kiwifruit, fuzzy	Whole Fruit	Whole Fruit	Whole Fruit	fruit_exc_juice
10	10B	1002197000	Kumquat	Whole Fruit	Whole Fruit	Whole Fruit	fruit_exc_juice
10	10B	1002199000	Lemon	Whole Fruit	Whole Fruit	Whole Fruit	fruit_exc_juice
10	10B	1002201000	Lemon, peel	Whole Fruit	Whole Fruit	Whole Fruit	fruit_exc_juice
10	10B	1002206000	Lime	Whole Fruit	Whole Fruit	Whole Fruit	fruit_exc_juice
13	13A	1301208000	Loganberry	Whole Fruit	Whole Fruit	Whole Fruit	fruit_exc_juice
24	24C	2403209000	Longan	Whole Fruit	Whole Fruit	Whole Fruit	fruit_exc_juice
11	11	1100210000	Loquat	Whole Fruit	Whole Fruit	Whole Fruit	fruit_exc_juice
24	24A	2401211000	Lychee	Whole Fruit	Whole Fruit	Whole Fruit	fruit_exc_juice
24	24A	2401212000	Lychee, dried	Dried Fruit	Whole Fruit	Whole Fruit	fruit_exc_juice
24	24C	2403214000	Mamey apple	Whole Fruit	Whole Fruit	Whole Fruit	fruit_exc_juice
24	24B	2402215000	Mango	Whole Fruit	Whole Fruit	Whole Fruit	fruit_exc_juice
24	24B	2402216000	Mango, dried	Dried Fruit	Whole Fruit	Whole Fruit	fruit_exc_juice
13	13C	1303227000	Mulberry	Whole Fruit	Whole Fruit	Whole Fruit	fruit_exc_juice
12	12B	1202230000	Nectarine	Whole Fruit	Whole Fruit	Whole Fruit	fruit_exc_juice
10	10A	1001240000	Orange	Whole Fruit	Whole Fruit	Whole Fruit	fruit_exc_juice
10	10A	1001242000	Orange, peel	Whole Fruit	Whole Fruit	Whole Fruit	fruit_exc_juice
24	24B	2402245000	Papaya	Whole Fruit	Whole Fruit	Whole Fruit	fruit_exc_juice
24	24B	2402246000	Papaya, dried	Dried Fruit	Whole Fruit	Whole Fruit	fruit_exc_juice
24	24E	2405252000	Passionfruit	Whole Fruit	Whole Fruit	Whole Fruit	fruit_exc_juice
24	24B	2402254000	Pawpaw	Whole Fruit	Whole Fruit	Whole Fruit	fruit_exc_juice
12	12B	1202260000	Peach	Whole Fruit	Whole Fruit	Whole Fruit	fruit_exc_juice
12	12B	1202261000	Peach, dried	Dried Fruit	Whole Fruit	Whole Fruit	fruit_exc_juice
11	11	1100266000	Pear	Whole Fruit	Whole Fruit	Whole Fruit	fruit_exc_juice
11	11	1100267000	Pear, dried	Dried Fruit	Whole Fruit	Whole Fruit	fruit_exc_juice
24	24B	2402277000	Persimmon	Whole Fruit	Whole Fruit	Whole Fruit	fruit_exc_juice
24	24C	2403279000	Pineapple	Whole Fruit	Whole Fruit	Whole Fruit	fruit_exc_juice
24	24C	2403280000	Pineapple, dried	Dried Fruit	Whole Fruit	Whole Fruit	fruit_exc_juice
12	12C	1203285000	Plum	Whole Fruit	Whole Fruit	Whole Fruit	fruit_exc_juice
12	12C	1203287000	Plum, prune, dried	Dried Fruit	Whole Fruit	Whole Fruit	fruit_exc_juice
12	12C	1203286000	Plum, prune, fresh	Whole Fruit	Whole Fruit	Whole Fruit	fruit_exc_juice
24	24B	2402289000	Pomegranate	Whole Fruit	Whole Fruit	Whole Fruit	fruit_exc_juice
24	24D	2404062904	Prickly pear fruit	Whole Fruit	Whole Fruit	Whole Fruit	fruit_exc_juice
10	10C	1003307000	Pummelo	Whole Fruit	Whole Fruit	Whole Fruit	fruit_exc_juice
11	11	1100310000	Quince	Whole Fruit	Whole Fruit	Whole Fruit	fruit_exc_juice
13	13A	1301320000	Raspberry	Whole Fruit	Whole Fruit	Whole Fruit	fruit_exc_juice
24	24C	2403333000	Sapote, Mamey	Whole Fruit	Whole Fruit	Whole Fruit	fruit_exc_juice
24	24C	2403346000	Soursop	Whole Fruit	Whole Fruit	Whole Fruit	fruit_exc_juice
24	24A	2401351000	Spanish lime	Whole Fruit	Whole Fruit	Whole Fruit	fruit_exc_juice
23	23B	2302358000	Starfruit	Whole Fruit	Whole Fruit	Whole Fruit	fruit_exc_juice
13	13G	1307359000	Strawberry	Whole Fruit	Whole Fruit	Whole Fruit	fruit_exc_juice
24	24C	2403361000	Sugar apple	Whole Fruit	Whole Fruit	Whole Fruit	fruit_exc_juice
23	23B	2302368000	Tamarind	Whole Fruit	Whole Fruit	Whole Fruit	fruit_exc_juice
10	10A	1001369000	Tangerine	Whole Fruit	Whole Fruit	Whole Fruit	fruit_exc_juice
9	9A	901399000	Watermelon	Whole Fruit	Whole Fruit	Whole Fruit	fruit_exc_juice
11	11	1100010000	Apple, juice	Fruit juice	Fruit juice	Fruit juice	fruit_juice
12	12B	1202014000	Apricot, juice	Fruit juice	Fruit juice	Fruit juice	fruit_juice
13	13A	1301056000	Blackberry, juice	Fruit juice	Fruit juice	Fruit juice	fruit_juice
12	12A	1201091000	Cherry, juice	Fruit juice	Fruit juice	Fruit juice	fruit_juice
13	13GH	1307132000	Cranberry, juice	Fruit juice	Fruit juice	Fruit juice	fruit_juice
13	13DF	1304176000	Grape, juice	Fruit juice	Fruit juice	Fruit juice	fruit_juice
10	10C	1003181000	Grapefruit, juice	Fruit juice	Fruit juice	Fruit juice	fruit_juice
10	10B	1002200000	Lemon, juice	Fruit juice	Fruit juice	Fruit juice	fruit_juice
10	10B	1002207000	Lime, juice	Fruit juice	Fruit juice	Fruit juice	fruit_juice
24	24B	2402217000	Mango, juice	Fruit juice	Fruit juice	Fruit juice	fruit_juice
10	10A	1001241000	Orange, juice	Fruit juice	Fruit juice	Fruit juice	fruit_juice
24	24B	2402247000	Papaya, juice	Fruit juice	Fruit juice	Fruit juice	fruit_juice
24	24E	2405253000	Passionfruit, juice	Fruit juice	Fruit juice	Fruit juice	fruit_juice
12	12B	1202262000	Peach, juice	Fruit juice	Fruit juice	Fruit juice	fruit_juice
11	11	1100268000	Pear, juice	Fruit juice	Fruit juice	Fruit juice	fruit_juice
24	24C	2403281000	Pineapple, juice	Fruit juice	Fruit juice	Fruit juice	fruit_juice
12	12C	1203288000	Plum, prune, juice	Fruit juice	Fruit juice	Fruit juice	fruit_juice
24	24B	2402290000	Pomegranate, juice	Fruit juice	Fruit juice	Fruit juice	fruit_juice
13	13A	1301321000	Raspberry, juice	Fruit juice	Fruit juice	Fruit juice	fruit_juice
13	13G	1307360000	Strawberry, juice	Fruit juice	Fruit juice	Fruit juice	fruit_juice
10	10A	1001370000	Tangerine, juice	Fruit juice	Fruit juice	Fruit juice	fruit_juice
9	9A	901400000	Watermelon, juice	Fruit juice	Fruit juice	Fruit juice	fruit_juice
15	15	1500120000	Corn, field, flour	Refined Grains	Refined Grains	Refined Grains	gr_refined
15	15	1500123000	Corn, field, starch	Refined Grains	Refined Grains	Refined Grains	gr_refined
15	15	1500325000	Rice, flour	Refined Grains	Refined Grains	Refined Grains	gr_refined
15	15	1500323000	Rice, white	Refined Grains	Refined Grains	Refined Grains	gr_refined
15	15	1500402000	Wheat, flour	Refined Grains	Refined Grains	Refined Grains	gr_refined
95	O	9500006000	Amaranth, grain	Whole Grains	Whole Grains	Whole Grains	gr_whole
15	15	1500027000	Barley, bran	Whole Grains	Whole Grains	Whole Grains	gr_whole
15	15	1500026000	Barley, flour	Whole Grains	Whole Grains	Whole Grains	gr_whole
15	15	1500025000	Barley, pearled barley	Whole Grains	Whole Grains	Whole Grains	gr_whole
15	15	1500065000	Buckwheat	Whole Grains	Whole Grains	Whole Grains	gr_whole
15	15	1500066000	Buckwheat, flour	Whole Grains	Whole Grains	Whole Grains	gr_whole
15	15	1500122000	Corn, field, bran	Whole Grains	Whole Grains	Whole Grains	gr_whole
15	15	1500121000	Corn, field, meal	Whole Grains	Whole Grains	Whole Grains	gr_whole
15	15	1500126000	Corn, pop	Savory snacks	Snacks and Sweets	Snacks and Sweets	gr_whole
15	15	1500226000	Millet, grain	Whole Grains	Whole Grains	Whole Grains	gr_whole
15	15	1500231000	Oat, bran	Whole Grains	Whole Grains	Whole Grains	gr_whole
15	15	1500232000	Oat, flour	Whole Grains	Whole Grains	Whole Grains	gr_whole
15	15	1500233000	Oat, groats/rolled oats	Whole Grains	Whole Grains	Whole Grains	gr_whole
95	O	9500311000	Quinoa, grain	Whole Grains	Whole Grains	Whole Grains	gr_whole
15	15	1500326000	Rice, bran	Whole Grains	Whole Grains	Whole Grains	gr_whole
15	15	1500324000	Rice, brown	Whole Grains	Whole Grains	Whole Grains	gr_whole
15	15	1500329000	Rye, flour	Whole Grains	Whole Grains	Whole Grains	gr_whole
15	15	1500328000	Rye, grain	Whole Grains	Whole Grains	Whole Grains	gr_whole
15	15	1500344000	Sorghum, grain	Whole Grains	Whole Grains	Whole Grains	gr_whole
95	O	9500373500	Teff, flour	Whole Grains	Whole Grains	Whole Grains	gr_whole
15	15	1500381000	Triticale, flour	Whole Grains	Whole Grains	Whole Grains	gr_whole
15	15	1500404000	Wheat, bran	Whole Grains	Whole Grains	Whole Grains	gr_whole
15	15	1500403000	Wheat, germ	Whole Grains	Whole Grains	Whole Grains	gr_whole
15	15	1500401000	Wheat, grain	Whole Grains	Whole Grains	Whole Grains	gr_whole
15	15	1500405000	Wild rice	Whole Grains	Whole Grains	Whole Grains	gr_whole
18	18	1800002000	Alfalfa, seed	Beans, peas and legumes	Beans, peas and legumes	Beans, peas and legumes	leg_tot
6	6C	603035000	Bean, great northern, seed	Beans, peas and legumes	Beans, peas and legumes	Beans, peas and legumes	leg_tot
6	6C	603030000	Bean, black, seed	Beans, peas and legumes	Beans, peas and legumes	Beans, peas and legumes	leg_tot
6	6C	603032000	Bean, broad, seed	Beans, peas and legumes	Beans, peas and legumes	Beans, peas and legumes	leg_tot
6	6B	602031000	Bean, broad, succulent	Beans, peas and legumes	Beans, peas and legumes	Beans, peas and legumes	leg_tot
6	6C	603034000	Bean, cowpea, seed	Beans, peas and legumes	Beans, peas and legumes	Beans, peas and legumes	leg_tot
6	6B	602033000	Bean, cowpea, succulent	Beans, peas and legumes	Beans, peas and legumes	Beans, peas and legumes	leg_tot
6	6C	603036000	Bean, kidney, seed	Beans, peas and legumes	Beans, peas and legumes	Beans, peas and legumes	leg_tot
6	6C	603038000	Bean, lima, seed	Beans, peas and legumes	Beans, peas and legumes	Beans, peas and legumes	leg_tot
6	6B	602037000	Bean, lima, succulent	Beans, peas and legumes	Beans, peas and legumes	Beans, peas and legumes	leg_tot
6	6C	603039000	Bean, mung, seed	Beans, peas and legumes	Beans, peas and legumes	Beans, peas and legumes	leg_tot
6	6C	603040000	Bean, navy, seed	Beans, peas and legumes	Beans, peas and legumes	Beans, peas and legumes	leg_tot
6	6C	603041000	Bean, pink, seed	Beans, peas and legumes	Beans, peas and legumes	Beans, peas and legumes	leg_tot
6	6C	603042000	Bean, pinto, seed	Beans, peas and legumes	Beans, peas and legumes	Beans, peas and legumes	leg_tot
6	6A	601043000	Bean, snap, succulent	Beans, peas and legumes	Beans, peas and legumes	Beans, peas and legumes	leg_tot
23	23B	2302077000	Carob	Beans, peas and legumes	Beans, peas and legumes	Beans, peas and legumes	leg_tot
6	6C	603099000	Chickpea, flour	Beans, peas and legumes	Beans, peas and legumes	Beans, peas and legumes	leg_tot
6	6C	603098000	Chickpea, seed	Beans, peas and legumes	Beans, peas and legumes	Beans, peas and legumes	leg_tot
6	6C	603182000	Guar, seed	Beans, peas and legumes	Beans, peas and legumes	Beans, peas and legumes	leg_tot
6	6C	603203000	Lentil, seed	Beans, peas and legumes	Beans, peas and legumes	Beans, peas and legumes	leg_tot
6	6C	603256000	Pea, dry	Starchy Vegetables	Starchy Vegetables	Starchy Vegetables	leg_tot
6	6A	601257000	Pea, edible podded, succulent	Beans, peas and legumes	Beans, peas and legumes	Beans, peas and legumes	leg_tot
6	6C	603258000	Pea, pigeon, seed	Beans, peas and legumes	Beans, peas and legumes	Beans, peas and legumes	leg_tot
6	6B	602259000	Pea, pigeon, succulent	Beans, peas and legumes	Beans, peas and legumes	Beans, peas and legumes	leg_tot
6	6B	602255000	Pea, succulent	Beans, peas and legumes	Beans, peas and legumes	Beans, peas and legumes	leg_tot
6	6	600348000	Soybean, flour	Grains	Grains	Grains	leg_tot
6	6	600347000	Soybean, seed	Beans, peas and legumes	Beans, peas and legumes	Beans, peas and legumes	leg_tot
6	6AB	601349500	Soybean, vegetable	Beans, peas and legumes	Beans, peas and legumes	Beans, peas and legumes	leg_tot
14	14	1400004000	Almond, oil	Fats and oils	Fats and oils	Fats and oils	oil
10	10A	1001108000	Citrus, oil	Fats and oils	Fats and oils	Fats and oils	oil
14	14	1400114000	Coconut, oil	Fats and oils	Fats and oils	Fats and oils	oil
15	15	1500125000	Corn, field, oil	Fats and oils	Fats and oils	Fats and oils	oil
20	20C	2003128000	Cottonseed, oil	Fats and oils	Fats and oils	Fats and oils	oil
20	20A	2001163000	Flax seed, oil	Fats and oils	Fats and oils	Fats and oils	oil
14	14	1400156000	Hazelnut, oil	Fats and oils	Fats and oils	Fats and oils	oil
23	23A	2301236000	Olive, oil	Fats and oils	Fats and oils	Fats and oils	oil
95	O	9500244000	Palm, oil	Fats and oils	Fats and oils	Fats and oils	oil
95	O	9500265000	Peanut, oil	Fats and oils	Fats and oils	Fats and oils	oil
95	O	9500276000	Peppermint, oil	Fats and oils	Fats and oils	Fats and oils	oil
20	20A	2001319000	Rapeseed, oil	Fats and oils	Fats and oils	Fats and oils	oil
20	20B	2002330000	Safflower, oil	Fats and oils	Fats and oils	Fats and oils	oil
20	20A	2001337000	Sesame, oil	Fats and oils	Fats and oils	Fats and oils	oil
6	6	600350000	Soybean, oil	Fats and oils	Fats and oils	Fats and oils	oil
95	O	9500353000	Spearmint, oil	Fats and oils	Fats and oils	Fats and oils	oil
20	20B	2002365000	Sunflower, oil	Fats and oils	Fats and oils	Fats and oils	oil
95	O	9500186100	Bee pollen	Sugars and honey	Sugars	Snacks and sweets	other
95	O	9500109000	Cocoa bean, chocolate	Candy	Sweets	Snacks and sweets	other
95	O	9500110000	Cocoa bean, powder	Candy	Sweets	Snacks and sweets	other
14	14	1400113000	Coconut, milk	Milk Alternative	Milk Alternatives	Dairy substitutes	other
13	13DF	1304179000	Grape, wine and sherry	Alcoholic beverages	Alcoholic beverages	Alcoholic beverages	other
95	O	9500188000	Hop	Alcoholic beverages	Alcoholic beverages	Alcoholic beverages	other
95	O	9500390000	Vinegar	Condiments and sauces	Condiments and sauces	Condiments and sauces	other
70	70	7000146000	Egg, white	Egg	Egg	Egg	pf_egg
70	70	7000145000	Egg, whole	Egg	Egg	Egg	pf_egg
70	70	7000147000	Egg, yolk	Egg	Egg	Egg	pf_egg
14	14	1400003000	Almond	Nuts and seeds	Nuts and seeds	Nuts and seeds	pf_ns
14	14	1400059000	Brazil nut	Nuts and seeds	Nuts and seeds	Nuts and seeds	pf_ns
14	14	1400068000	Butternut	Nuts and seeds	Nuts and seeds	Nuts and seeds	pf_ns
14	14	1400081000	Cashew	Nuts and seeds	Nuts and seeds	Nuts and seeds	pf_ns
14	14	1400092000	Chestnut	Nuts and seeds	Nuts and seeds	Nuts and seeds	pf_ns
20	20A	2001162900	Flax, seed	Nuts and seeds	Nuts and seeds	Nuts and seeds	pf_ns
14	14	1400155000	Hazelnut	Nuts and seeds	Nuts and seeds	Nuts and seeds	pf_ns
14	14	1400185000	Hickory nut	Nuts and seeds	Nuts and seeds	Nuts and seeds	pf_ns
14	14	1400213000	Macadamia nut	Nuts and seeds	Nuts and seeds	Nuts and seeds	pf_ns
95	O	9500263000	Peanut	Nuts and seeds	Nuts and seeds	Nuts and seeds	pf_ns
95	O	9500264000	Peanut, butter	Nuts and seeds	Nuts and seeds	Nuts and seeds	pf_ns
14	14	1400269000	Pecan	Nuts and seeds	Nuts and seeds	Nuts and seeds	pf_ns
14	14	1400278000	Pine nut	Nuts and seeds	Nuts and seeds	Nuts and seeds	pf_ns
14	14	1400282000	Pistachio	Nuts and seeds	Nuts and seeds	Nuts and seeds	pf_ns
95	O	9500306000	Psyllium, seed	Nuts and seeds	Nuts and seeds	Nuts and seeds	pf_ns
9	9B	902309000	Pumpkin, seed	Nuts and seeds	Nuts and seeds	Nuts and seeds	pf_ns
20	20A	2001336000	Sesame, seed	Nuts and seeds	Nuts and seeds	Nuts and seeds	pf_ns
20	20B	2002364000	Sunflower, seed	Nuts and seeds	Nuts and seeds	Nuts and seeds	pf_ns
14	14	1400391000	Walnut	Nuts and seeds	Nuts and seeds	Nuts and seeds	pf_ns
40	40	4000094000	Chicken, liver	Liver and organ meats	Liver and organ meats	Poultry	pf_poultry_tot
40	40	4000093000	Chicken, meat	Chicken	Poultry	Poultry	pf_poultry_tot
40	40	4000095000	Chicken, meat byproducts	Chicken	Poultry	Poultry	pf_poultry_tot
40	40	4000097000	Chicken, skin	Chicken	Poultry	Poultry	pf_poultry_tot
60	60	6000302000	Poultry, other, liver	Liver and organ meats	Liver and organ meats	Poultry	pf_poultry_tot
60	60	6000301000	Poultry, other, meat	Turkey, duck, other poultry	Poultry	Poultry	pf_poultry_tot
60	60	6000303000	Poultry, other, meat byproducts	Turkey, duck, other poultry	Poultry	Poultry	pf_poultry_tot
60	60	6000305000	Poultry, other, skin	Turkey, duck, other poultry	Poultry	Poultry	pf_poultry_tot
50	50	5000383000	Turkey, liver	Liver and organ meats	Liver and organ meats	Poultry	pf_poultry_tot
50	50	5000382000	Turkey, meat	Turkey, duck, other poultry	Poultry	Poultry	pf_poultry_tot
50	50	5000384000	Turkey, meat byproducts	Turkey, duck, other poultry	Poultry	Poultry	pf_poultry_tot
50	50	5000386000	Turkey, skin	Turkey, duck, other poultry	Poultry	Poultry	pf_poultry_tot
31	31	3100048000	Beef, kidney	Liver and organ meats	Liver and organ meats	Red meats	pf_redm_tot
31	31	3100049000	Beef, liver	Liver and organ meats	Liver and organ meats	Red meats	pf_redm_tot
31	31	3100044000	Beef, meat	Beef	Red meats	Red meats	pf_redm_tot
31	31	3100046000	Beef, meat byproducts	Beef	Red meats	Red meats	pf_redm_tot
31	31	3100045000	Beef, meat, dried	Beef	Red meats	Red meats	pf_redm_tot
32	32	3200172000	Goat, kidney	Liver and organ meats	Liver and organ meats	Red meats	pf_redm_tot
32	32	3200173000	Goat, liver	Liver and organ meats	Liver and organ meats	Red meats	pf_redm_tot
32	32	3200169000	Goat, meat	Lamb, goat, game	Red meats	Red meats	pf_redm_tot
32	32	3200170000	Goat, meat byproducts	Lamb, goat, game	Red meats	Red meats	pf_redm_tot
33	33	3300189000	Horse, meat	Red meats	Red meats	Red meats	pf_redm_tot
38	38	3800221000	Meat, game	Lamb, goat, game	Red meats	Red meats	pf_redm_tot
34	34	3400294000	Pork, kidney	Liver and organ meats	Liver and organ meats	Red meats	pf_redm_tot
34	34	3400295000	Pork, liver	Liver and organ meats	Liver and organ meats	Red meats	pf_redm_tot
34	34	3400290000	Pork, meat	Pork	Red meats	Red meats	pf_redm_tot
34	34	3400292000	Pork, meat byproducts	Pork	Red meats	Red meats	pf_redm_tot
34	34	3400291000	Pork, skin	Pork	Red meats	Red meats	pf_redm_tot
39	39	3900312000	Rabbit, meat	Turkey, duck, other poultry	Poultry	Poultry	pf_redm_tot
35	35	3500342000	Sheep, kidney	Liver and organ meats	Liver and organ meats	Red meats	pf_redm_tot
35	35	3500343000	Sheep, liver	Liver and organ meats	Liver and organ meats	Red meats	pf_redm_tot
35	35	3500339000	Sheep, meat	Lamb, goat, game	Red meats	Red meats	pf_redm_tot
35	35	3500340000	Sheep, meat byproducts	Lamb, goat, game	Red meats	Red meats	pf_redm_tot
80	80	8000157000	Fish-freshwater finfish	Fish	Seafood	Seafood	pf_seafood
80	80	8000158000	Fish-freshwater finfish, farm raised	Fish	Seafood	Seafood	pf_seafood
80	80	8000160000	Fish-saltwater finfish, other	Fish	Seafood	Seafood	pf_seafood
80	80	8000159000	Fish-saltwater finfish, tuna	Fish	Seafood	Seafood	pf_seafood
80	80	8000161000	Fish-shellfish, crustacean	Fish	Seafood	Seafood	pf_seafood
80	80	8000162000	Fish-shellfish, mollusc	Fish	Seafood	Seafood	pf_seafood
31	31	3100047000	Beef, fat	Fats and oils	Fats and oils	Fats and oils	sat_fat
40	40	4000096000	Chicken, fat	Fats and oils	Fats and oils	Fats and oils	sat_fat
32	32	3200171000	Goat, fat	Fats and oils	Fats and oils	Fats and oils	sat_fat
36	36	3600222000	Milk, fat	Milk	Milk	Dairy	sat_fat
34	34	3400293000	Pork, fat	Fats and oils	Fats and oils	Fats and oils	sat_fat
60	60	6000304000	Poultry, other, fat	Fats and oils	Fats and oils	Fats and oils	sat_fat
35	35	3500341000	Sheep, fat	Fats and oils	Fats and oils	Fats and oils	sat_fat
50	50	5000385000	Turkey, fat	Fats and oils	Fats and oils	Fats and oils	sat_fat
4	4A	401005000	Amaranth, leafy	Dark Green Vegetables	Dark Green Vegetables	Dark Green Vegetables	veg_dg
4	4B	402018000	Arugula	Dark Green Vegetables	Dark Green Vegetables	Dark Green Vegetables	veg_dg
22	22A	2201019000	Asparagus	Other vegetables	Other vegetables	Other vegetables	veg_dg
2	2	200051000	Beet, garden, tops	Dark Green Vegetables	Dark Green Vegetables	Dark Green Vegetables	veg_dg
5	5	500061000	Broccoli	Dark Green Vegetables	Dark Green Vegetables	Dark Green Vegetables	veg_dg
4	4B	402063000	Broccoli raab	Dark Green Vegetables	Dark Green Vegetables	Dark Green Vegetables	veg_dg
4	4B	402062000	Broccoli, Chinese	Dark Green Vegetables	Dark Green Vegetables	Dark Green Vegetables	veg_dg
5	5	500064000	Brussels sprouts	Dark Green Vegetables	Dark Green Vegetables	Dark Green Vegetables	veg_dg
4	4B	402070000	Cabbage, Chinese, bok choy	Dark Green Vegetables	Dark Green Vegetables	Dark Green Vegetables	veg_dg
22	22A	2201087000	Celtuce	Other vegetables	Other vegetables	Other vegetables	veg_dg
4	4A	401104000	Chrysanthemum, garland	Dark Green Vegetables	Dark Green Vegetables	Dark Green Vegetables	veg_dg
4	4B	402117000	Collards	Dark Green Vegetables	Dark Green Vegetables	Dark Green Vegetables	veg_dg
4	4B	402133000	Cress, garden	Dark Green Vegetables	Dark Green Vegetables	Dark Green Vegetables	veg_dg
4	4B	402134000	Cress, upland	Dark Green Vegetables	Dark Green Vegetables	Dark Green Vegetables	veg_dg
4	4A	401150000	Endive	Dark Green Vegetables	Dark Green Vegetables	Dark Green Vegetables	veg_dg
22	22A	2201152000	Fennel, Florence	Other vegetables	Other vegetables	Other vegetables	veg_dg
95	O	9500177000	Grape, leaves	Dark Green Vegetables	Dark Green Vegetables	Dark Green Vegetables	veg_dg
4	4B	402194000	Kale	Dark Green Vegetables	Dark Green Vegetables	Dark Green Vegetables	veg_dg
22	22A	2201196000	Kohlrabi	Other vegetables	Other vegetables	Other vegetables	veg_dg
4	4B	402229000	Mustard greens	Dark Green Vegetables	Dark Green Vegetables	Dark Green Vegetables	veg_dg
22	22A	2201243000	Palm heart, leaves	Other vegetables	Other vegetables	Other vegetables	veg_dg
4	4A	401248000	Parsley, leaves	Dark Green Vegetables	Dark Green Vegetables	Dark Green Vegetables	veg_dg
2	2	200317000	Radish, Oriental, tops	Other Vegetables	Other Vegetables	Other Vegetables	veg_dg
4	4B	402315000	Radish, tops	Dark Green Vegetables	Dark Green Vegetables	Dark Green Vegetables	veg_dg
4	4B	402318000	Rape greens	Dark Green Vegetables	Dark Green Vegetables	Dark Green Vegetables	veg_dg
2	2	200332000	Salsify, tops	Other Vegetables	Other Vegetables	Other Vegetables	veg_dg
4	4A	401355000	Spinach	Dark Green Vegetables	Dark Green Vegetables	Dark Green Vegetables	veg_dg
4	4A	401367000	Swiss chard	Dark Green Vegetables	Dark Green Vegetables	Dark Green Vegetables	veg_dg
4	4B	402389000	Turnip, greens	Dark Green Vegetables	Dark Green Vegetables	Dark Green Vegetables	veg_dg
4	4B	402398000	Watercress	Dark Green Vegetables	Dark Green Vegetables	Dark Green Vegetables	veg_dg
95	O	9500016000	Artichoke, globe	Other Vegetables	Other Vegetables	Other Vegetables	veg_oth
1	1CD	103017000	Artichoke, Jerusalem	Other Vegetables	Other Vegetables	Other Vegetables	veg_oth
22	22A	2201022000	Bamboo, shoots	Other vegetables	Other vegetables	Other vegetables	veg_oth
19	19A	1901029000	Basil, dried leaves	Other Vegetables	Other Vegetables	Other Vegetables	veg_oth
19	19A	1901028000	Basil, fresh leaves	Other Vegetables	Other Vegetables	Other Vegetables	veg_oth
95	O	9500054000	Belgium endive	Other Vegetables	Other Vegetables	Other Vegetables	veg_oth
5	5	500069000	Cabbage	Other vegetables	Other vegetables	Other vegetables	veg_oth
5	5	500072000	Cabbage, Chinese, mustard	Other vegetables	Other vegetables	Other vegetables	veg_oth
5	5	500071000	Cabbage, Chinese, napa	Other vegetables	Other vegetables	Other vegetables	veg_oth
22	22A	2201073000	Cactus	Other vegetables	Other vegetables	Other vegetables	veg_oth
22	22B	2202076000	Cardoon	Other vegetables	Other vegetables	Other vegetables	veg_oth
5	5	500083000	Cauliflower	Other vegetables	Other vegetables	Other vegetables	veg_oth
1	1AB	101084000	Celeriac	Other Vegetables	Other Vegetables	Other Vegetables	veg_oth
22	22B	2202085000	Celery	Other Vegetables	Other Vegetables	Other Vegetables	veg_oth
22	22B	2202086000	Celery, juice	Vegetable juice	Vegetable juice	Other Vegetables	veg_oth
1	1AB	101100000	Chicory, roots	Other Vegetables	Other Vegetables	Other Vegetables	veg_oth
2	2	200101000	Chicory, tops	Other Vegetables	Other Vegetables	Other Vegetables	veg_oth
9	9B	902102000	Chinese waxgourd	Other Vegetables	Other Vegetables	Other Vegetables	veg_oth
19	19A	1901102500	Chive, dried leaves	Other Vegetables	Other Vegetables	Other Vegetables	veg_oth
3	3B	302103000	Chive, fresh leaves	Other Vegetables	Other Vegetables	Other Vegetables	veg_oth
4	4A	401118000	Cilantro, leaves	Herbs and spices	Herbs and spices	Other vegetables	veg_oth
19	19B	1902105000	Cinnamon	Other Vegetables	Other Vegetables	Other Vegetables	veg_oth
19	19B	1902119000	Coriander, seed	Other Vegetables	Other Vegetables	Other Vegetables	veg_oth
9	9B	902135000	Cucumber	Other Vegetables	Other Vegetables	Other Vegetables	veg_oth
4	4A	401138000	Dandelion, leaves	Other Vegetables	Other Vegetables	Other Vegetables	veg_oth
2	2	200140000	Dasheen, leaves	Other Vegetables	Other Vegetables	Other Vegetables	veg_oth
19	19B	1902143000	Dill, seed	Other Vegetables	Other Vegetables	Other Vegetables	veg_oth
4	4A	401144000	Dillweed	Other Vegetables	Other Vegetables	Other Vegetables	veg_oth
8	8BC	802148000	Eggplant	Other Vegetables	Other Vegetables	Other Vegetables	veg_oth
3	3A	301165000	Garlic, bulb	Other Vegetables	Other Vegetables	Other Vegetables	veg_oth
1	1CD	103166000	Ginger	Other Vegetables	Other Vegetables	Other Vegetables	veg_oth
1	1CD	103167000	Ginger, dried	Other Vegetables	Other Vegetables	Other Vegetables	veg_oth
1	1AB	101168000	Ginseng, dried	Other Vegetables	Other Vegetables	Other Vegetables	veg_oth
19	19A	1901184000	Herbs, other	Other Vegetables	Other Vegetables	Other Vegetables	veg_oth
1	1AB	101190000	Horseradish	Other Vegetables	Other Vegetables	Other Vegetables	veg_oth
3	3B	302198000	Leek	Other Vegetables	Other Vegetables	Other Vegetables	veg_oth
19	19A	1901202000	Lemongrass	Other Vegetables	Other Vegetables	Other Vegetables	veg_oth
4	4A	401204000	Lettuce, head	Other Vegetables	Other Vegetables	Other Vegetables	veg_oth
4	4A	401205000	Lettuce, leaf	Other Vegetables	Other Vegetables	Other Vegetables	veg_oth
19	19A	1901220000	Marjoram	Other Vegetables	Other Vegetables	Other Vegetables	veg_oth
21	21	2100228000	Mushroom	Other Vegetables	Other Vegetables	Other Vegetables	veg_oth
8	8BC	802234000	Okra	Other Vegetables	Other Vegetables	Other Vegetables	veg_oth
23	23A	2301235000	Olive	Other vegetables	Other vegetables	Other vegetables	veg_oth
3	3A	301237000	Onion, bulb	Other Vegetables	Other Vegetables	Other Vegetables	veg_oth
3	3A	301238000	Onion, bulb, dried	Other Vegetables	Other Vegetables	Other Vegetables	veg_oth
3	3B	302239000	Onion, green	Other Vegetables	Other Vegetables	Other Vegetables	veg_oth
19	19A	1901249000	Parsley, dried leaves	Other vegetables	Other vegetables	Other vegetables	veg_oth
1	1AB	101250000	Parsley, turnip rooted	Other Vegetables	Other Vegetables	Other Vegetables	veg_oth
1	1AB	101251000	Parsnip	Other Vegetables	Other Vegetables	Other Vegetables	veg_oth
19	19B	1902274000	Pepper, black and white	Other Vegetables	Other Vegetables	Other Vegetables	veg_oth
8	8BC	802272000	Pepper, nonbell	Other Vegetables	Other Vegetables	Other Vegetables	veg_oth
8	8BC	802273000	Pepper, nonbell, dried	Other Vegetables	Other Vegetables	Other Vegetables	veg_oth
95	O	9500275000	Peppermint	Herbs and spices	Herbs and spices	Other Vegetables	veg_oth
4	4A	401313000	Radicchio	Other Vegetables	Other Vegetables	Other Vegetables	veg_oth
1	1AB	101316000	Radish, Oriental, roots	Other Vegetables	Other Vegetables	Other Vegetables	veg_oth
1	1AB	101314000	Radish, roots	Other Vegetables	Other Vegetables	Other Vegetables	veg_oth
22	22B	2202322000	Rhubarb	Other Vegetables	Other Vegetables	Other Vegetables	veg_oth
1	1AB	101327000	Rutabaga	Other Vegetables	Other Vegetables	Other Vegetables	veg_oth
1	1AB	101331000	Salsify, roots	Other Vegetables	Other Vegetables	Other Vegetables	veg_oth
19	19A	1901334000	Savory	Other Vegetables	Other Vegetables	Other Vegetables	veg_oth
95	O	9500335000	Seaweed	Dark Green Vegetables	Dark Green Vegetables	Dark Green Vegetables	veg_oth
3	3A	301338000	Shallot, bulb	Other Vegetables	Other Vegetables	Other Vegetables	veg_oth
3	3B	302338500	Shallot, fresh leaves	Other Vegetables	Other Vegetables	Other Vegetables	veg_oth
95	O	9500352000	Spearmint	Herbs and spices	Herbs and spices	Other vegetables	veg_oth
19	19B	1902354000	Spices, other	Other Vegetables	Other Vegetables	Other Vegetables	veg_oth
9	9B	902356000	Squash, summer	Other vegetables	Other vegetables	Other vegetables	veg_oth
8	8A	801374000	Tomatillo	Other vegetables	Other vegetables	Other vegetables	veg_oth
1	1CD	103387000	Turmeric	Other Vegetables	Other Vegetables	Other Vegetables	veg_oth
1	1AB	101388000	Turnip, roots	Other Vegetables	Other Vegetables	Other Vegetables	veg_oth
1	1AB	101050000	Beet, garden, roots	Red and Orange Vegetables	Red and Orange Vegetables	Red and Orange Vegetables	veg_ro
1	1AB	101078000	Carrot	Red and Orange Vegetables	Red and Orange Vegetables	Red and Orange Vegetables	veg_ro
1	1AB	101079000	Carrot, juice	Vegetable juice	Vegetable juice	Red and Orange Vegetables	veg_ro
8	8B	802270000	Pepper, bell	Red and Orange Vegetables	Red and Orange Vegetables	Red and Orange Vegetables	veg_ro
8	8B	802271000	Pepper, bell, dried	Red and Orange Vegetables	Red and Orange Vegetables	Red and Orange Vegetables	veg_ro
9	9B	902308000	Pumpkin	Red and Orange Vegetables	Red and Orange Vegetables	Red and Orange Vegetables	veg_ro
1	1CD	103366000	Sweet potato	Red and Orange Vegetables	Red and Orange Vegetables	Red and Orange Vegetables	veg_ro
8	8A	801375000	Tomato	Red and Orange Vegetables	Red and Orange Vegetables	Red and Orange Vegetables	veg_ro
8	8A	801378000	Tomato, dried	Red and Orange Vegetables	Red and Orange Vegetables	Red and Orange Vegetables	veg_ro
8	8A	801379000	Tomato, juice	Vegetable juice	Vegetable juice	Vegetable juice	veg_ro
8	8A	801376000	Tomato, paste	Red and Orange Vegetables	Red and Orange Vegetables	Red and Orange Vegetables	veg_ro
8	8A	801377000	Tomato, puree	Red and Orange Vegetables	Red and Orange Vegetables	Red and Orange Vegetables	veg_ro
8	8A	801380000	Tree Tomato	Red and Orange Vegetables	Red and Orange Vegetables	Red and Orange Vegetables	veg_ro
1	1CD	103015000	Arrowroot, flour	Starchy Vegetables	Starchy Vegetables	Starchy Vegetables	veg_sta
1	1AB	101067000	Burdock	Starchy Vegetables	Starchy Vegetables	Starchy Vegetables	veg_sta
1	1CD	103082000	Cassava	Starchy Vegetables	Starchy Vegetables	Starchy Vegetables	veg_sta
15	15	1500127000	Corn, sweet	Starchy Vegetables	Starchy Vegetables	Starchy Vegetables	veg_sta
1	1CD	103139000	Dasheen, corm	Starchy Vegetables	Starchy Vegetables	Starchy Vegetables	veg_sta
24	24B	2402283000	Plantain	Starchy Vegetables	Starchy Vegetables	Starchy Vegetables	veg_sta
24	24B	2402284000	Plantain, dried	Starchy Vegetables	Starchy Vegetables	Starchy Vegetables	veg_sta
1	1C	103296000	Potato, chips	Savory snacks	Snacks and Sweets	Snacks and Sweets	veg_sta
1	1C	103297000	Potato, dry (granules/ flakes)	Starchy Vegetables	Starchy Vegetables	Starchy Vegetables	veg_sta
1	1C	103298000	Potato, flour	Starchy Vegetables	Starchy Vegetables	Starchy Vegetables	veg_sta
1	1C	103300000	Potato, tuber, w/o peel	Starchy Vegetables	Starchy Vegetables	Starchy Vegetables	veg_sta
1	1C	103299000	Potato, tuber, w/peel	Starchy Vegetables	Starchy Vegetables	Starchy Vegetables	veg_sta
9	9B	902357000	Squash, winter	Starchy Vegetables	Starchy Vegetables	Starchy Vegetables	veg_sta
1	1CD	103371000	Tanier, corm	Starchy Vegetables	Starchy Vegetables	Starchy Vegetables	veg_sta
95	O	9500397000	Water chestnut	Starchy Vegetables	Starchy Vegetables	Starchy Vegetables	veg_sta
1	1CD	103407000	Yam bean	Starchy Vegetables	Starchy Vegetables	Starchy Vegetables	veg_sta
1	1CD	103406000	Yam, true	Starchy Vegetables	Starchy Vegetables	Starchy Vegetables	veg_sta
86	86A	8601000000	Water, direct, all sources	Water	Water	Water	water
86	86A	8601200000	Water, direct, bottled	Water	Water	Water	water
86	86A	8601300000	Water, direct, other	Water	Water	Water	water
86	86A	8601400000	Water, direct, source-NS	Water	Water	Water	water
86	86A	8601100000	Water, direct, tap	Water	Water	Water	water
86	86B	8602000000	Water, indirect, all sources	Water	Water	Water	water
86	86B	8602200000	Water, indirect, bottled	Water	Water	Water	water
86	86B	8602300000	Water, indirect, other	Water	Water	Water	water
86	86B	8602400000	Water, indirect, source-NS	Water	Water	Water	water
86	86B	8602100000	Water, indirect, tap	Water	Water	Water	water

## Sheet: Supp Table 5.1
Food Subgroup	FNDDS Food Code Prefix
added_sugar	91
babyfood	67
babyfood	76
babyfood	276
dairy_tot	1
dairy_tot	89901010
dairy_tot	89901020
fruit_exc_juice	62
fruit_exc_juice	63
fruit_exc_juice	611
fruit_exc_juice	781011
fruit_exc_juice	89902000
fruit_juice	64
fruit_juice	612
fruit_juice	78101000
leg_tot	41
oil	82
other	59
other	83
other	93
other	95
other	28500100
other	28520000
other	28522000
other	28522050
other	89901030
other	89901040
pf_egg	3
pf_ns	42
pf_ns	43
pf_ns	44
pf_pm	25
pf_poultry	24
pf_poultry	2714
pf_poultry	2724
pf_poultry	2734
pf_poultry	2744
pf_poultry	2754
pf_poultry	2814
pf_poultry	2834
pf_poultry	28500000
pf_poultry	28500050
pf_poultry	28500080
pf_poultry	28501110
pf_poultry	28510010
pf_poultry	89901006
pf_redm	20
pf_redm	21
pf_redm	22
pf_redm	23
pf_redm	2711
pf_redm	2712
pf_redm	2713
pf_redm	2716
pf_redm	2721
pf_redm	2722
pf_redm	2723
pf_redm	2726
pf_redm	2731
pf_redm	2732
pf_redm	2733
pf_redm	2736
pf_redm	2741
pf_redm	2742
pf_redm	2743
pf_redm	2746
pf_redm	2750
pf_redm	2751
pf_redm	2752
pf_redm	2756
pf_redm	2810
pf_redm	2811
pf_redm	2816
pf_redm	2831
pf_redm	2832
pf_redm	20000000
pf_redm	28500010
pf_redm	28500040
pf_redm	28500070
pf_redm	28501010
pf_redm	28520000
pf_redm	28520010
pf_redm	89901000
pf_redm	89901002
pf_redm	89901004
pf_redm	89902100
pf_seafood	26
pf_seafood	2715
pf_seafood	2725
pf_seafood	2735
pf_seafood	2745
pf_seafood	2755
pf_seafood	2815
pf_seafood	2835
pf_seafood	28520100
sat_fat	81
ssb	92
veg_dg	72
veg_dg	89902060
veg_oth	75
veg_oth	77
veg_oth	89902010
veg_oth	89902020
veg_oth	89902030
veg_oth	89902040
veg_oth	89902050
veg_ro	73
veg_ro	74
veg_ro	89901050
veg_ro	89902070
veg_sta	71
water	94

## Sheet: Supp Table 5.2
FNDDS Food Code	Food Subgroup
51000100	gr_refined
51000110	gr_refined
51000180	gr_refined
51000200	gr_refined
51000300	gr_refined
51101000	gr_refined
51101010	gr_refined
51101050	gr_refined
51101060	gr_refined
51105010	gr_refined
51105040	gr_refined
51106010	gr_refined
51107010	gr_refined
51107040	gr_refined
51108010	gr_refined
51108100	gr_refined
51109010	gr_refined
51109040	gr_refined
51109100	gr_refined
51109150	gr_refined
51111010	gr_refined
51111040	gr_refined
51113010	gr_refined
51113100	gr_refined
51115020	gr_refined
51119010	gr_refined
51119040	gr_refined
51121015	gr_refined
51121025	gr_refined
51121035	gr_refined
51121045	gr_refined
51121055	gr_refined
51121065	gr_refined
51121075	gr_refined
51121110	gr_refined
51122000	gr_refined
51122100	gr_refined
51122110	gr_refined
51127010	gr_refined
51127020	gr_refined
51129010	gr_refined
51129020	gr_refined
51133010	gr_refined
51133020	gr_refined
51134000	gr_refined
51135000	gr_refined
51136000	gr_refined
51140100	gr_refined
51150000	gr_refined
51153000	gr_refined
51154010	gr_refined
51154100	gr_refined
51154550	gr_refined
51154600	gr_refined
51155000	gr_refined
51156500	gr_refined
51157000	gr_refined
51158100	gr_refined
51159000	gr_refined
51160000	gr_refined
51160100	gr_refined
51160110	gr_refined
51161000	gr_refined
51161020	gr_refined
51161050	gr_refined
51161250	gr_refined
51161270	gr_refined
51161280	gr_refined
51165000	gr_refined
51166000	gr_refined
51166100	gr_refined
51166200	gr_refined
51166500	gr_refined
51167000	gr_refined
51180010	gr_refined
51180030	gr_refined
51180080	gr_refined
51182010	gr_refined
51182020	gr_refined
51183990	gr_refined
51184000	gr_refined
51184100	gr_refined
51184200	gr_refined
51184210	gr_refined
51184220	gr_refined
51184230	gr_refined
51184240	gr_refined
51184250	gr_refined
51184260	gr_refined
51185000	gr_refined
51186010	gr_refined
51186100	gr_refined
51186160	gr_refined
51187000	gr_refined
51187020	gr_refined
51188100	gr_refined
51188500	gr_refined
51300100	gr_refined
51300175	gr_refined
51300180	gr_refined
51300185	gr_refined
51300300	gr_refined
51300310	gr_refined
51301010	gr_refined
51301020	gr_refined
51301040	gr_refined
51301050	gr_refined
51301120	gr_refined
51301130	gr_refined
51301510	gr_refined
51301700	gr_refined
51301750	gr_refined
51301800	gr_refined
51301805	gr_refined
51301820	gr_refined
51302500	gr_refined
51303010	gr_refined
51303030	gr_refined
51303050	gr_refined
51303070	gr_refined
51303100	gr_refined
51320010	gr_refined
51320060	gr_refined
51320070	gr_refined
51320500	gr_refined
51401010	gr_refined
51401020	gr_refined
51401030	gr_refined
51404010	gr_refined
51404020	gr_refined
51404500	gr_refined
51404550	gr_refined
51407010	gr_refined
51420000	gr_refined
51421000	gr_refined
51501010	gr_refined
51501020	gr_refined
51501040	gr_refined
51501050	gr_refined
51501080	gr_refined
51502010	gr_refined
51602020	gr_refined
51620000	gr_refined
51620030	gr_refined
51630000	gr_refined
51630100	gr_refined
51630200	gr_refined
51801010	gr_refined
51801020	gr_refined
51805010	gr_refined
52101000	gr_refined
52101030	gr_refined
52101100	gr_refined
52102040	gr_refined
52103000	gr_refined
52104010	gr_refined
52104100	gr_refined
52104200	gr_refined
52105100	gr_refined
52105200	gr_refined
52201000	gr_refined
52202060	gr_refined
52204000	gr_refined
52206010	gr_refined
52206060	gr_refined
52208010	gr_refined
52208020	gr_refined
52208760	gr_refined
52209010	gr_refined
52215000	gr_refined
52215100	gr_refined
52215200	gr_refined
52215300	gr_refined
52215350	gr_refined
52220110	gr_refined
52301000	gr_refined
52302010	gr_refined
52302020	gr_refined
52302500	gr_refined
52302600	gr_refined
52303500	gr_refined
52304000	gr_refined
52304010	gr_refined
52304040	gr_refined
52304100	gr_refined
52304150	gr_refined
52306010	gr_refined
52306500	gr_refined
52306550	gr_refined
52306700	gr_refined
52311010	gr_refined
52401000	gr_refined
52403000	gr_refined
52404060	gr_refined
52405010	gr_refined
52407000	gr_refined
52408000	gr_refined
53100100	gr_refined
53101100	gr_refined
53101200	gr_refined
53101250	gr_refined
53102100	gr_refined
53102200	gr_refined
53102600	gr_refined
53102700	gr_refined
53102800	gr_refined
53103000	gr_refined
53104100	gr_refined
53104260	gr_refined
53104400	gr_refined
53104500	gr_refined
53104550	gr_refined
53104600	gr_refined
53105270	gr_refined
53105275	gr_refined
53105300	gr_refined
53106500	gr_refined
53108200	gr_refined
53109200	gr_refined
53109220	gr_refined
53110000	gr_refined
53111000	gr_refined
53112000	gr_refined
53112100	gr_refined
53114000	gr_refined
53114100	gr_refined
53115100	gr_refined
53115200	gr_refined
53115310	gr_refined
53115320	gr_refined
53115410	gr_refined
53115450	gr_refined
53116000	gr_refined
53116020	gr_refined
53116270	gr_refined
53116500	gr_refined
53116510	gr_refined
53116570	gr_refined
53116600	gr_refined
53116650	gr_refined
53117100	gr_refined
53117200	gr_refined
53118100	gr_refined
53118200	gr_refined
53118300	gr_refined
53118410	gr_refined
53118500	gr_refined
53118550	gr_refined
53119000	gr_refined
53120270	gr_refined
53120275	gr_refined
53121270	gr_refined
53121275	gr_refined
53122070	gr_refined
53122080	gr_refined
53123070	gr_refined
53123080	gr_refined
53124110	gr_refined
53200100	gr_refined
53201000	gr_refined
53202000	gr_refined
53203000	gr_refined
53203500	gr_refined
53204000	gr_refined
53204010	gr_refined
53204100	gr_refined
53204840	gr_refined
53204860	gr_refined
53205250	gr_refined
53205260	gr_refined
53206000	gr_refined
53206020	gr_refined
53206030	gr_refined
53206100	gr_refined
53206500	gr_refined
53206550	gr_refined
53207000	gr_refined
53207020	gr_refined
53207050	gr_refined
53208000	gr_refined
53208200	gr_refined
53209005	gr_refined
53209010	gr_refined
53209015	gr_refined
53209020	gr_refined
53209100	gr_refined
53209500	gr_refined
53210000	gr_refined
53210900	gr_refined
53211000	gr_refined
53220000	gr_refined
53220030	gr_refined
53220040	gr_refined
53222010	gr_refined
53222020	gr_refined
53223000	gr_refined
53224000	gr_refined
53224250	gr_refined
53226000	gr_refined
53226500	gr_refined
53226550	gr_refined
53226600	gr_refined
53230000	gr_refined
53233000	gr_refined
53233010	gr_refined
53233040	gr_refined
53233050	gr_refined
53233060	gr_refined
53233080	gr_refined
53233100	gr_refined
53234000	gr_refined
53234100	gr_refined
53234250	gr_refined
53235000	gr_refined
53235500	gr_refined
53236000	gr_refined
53236100	gr_refined
53237000	gr_refined
53237010	gr_refined
53238000	gr_refined
53239000	gr_refined
53239010	gr_refined
53239050	gr_refined
53239100	gr_refined
53240000	gr_refined
53240010	gr_refined
53241500	gr_refined
53241510	gr_refined
53241600	gr_refined
53242000	gr_refined
53243000	gr_refined
53243050	gr_refined
53244010	gr_refined
53244020	gr_refined
53246000	gr_refined
53247000	gr_refined
53247050	gr_refined
53247500	gr_refined
53260030	gr_refined
53260200	gr_refined
53260300	gr_refined
53260400	gr_refined
53260500	gr_refined
53260600	gr_refined
53261000	gr_refined
53270100	gr_refined
53300100	gr_refined
53300170	gr_refined
53301000	gr_refined
53301070	gr_refined
53301080	gr_refined
53301500	gr_refined
53303000	gr_refined
53303500	gr_refined
53303570	gr_refined
53304000	gr_refined
53304050	gr_refined
53305000	gr_refined
53305010	gr_refined
53305070	gr_refined
53305700	gr_refined
53305720	gr_refined
53307000	gr_refined
53307050	gr_refined
53307070	gr_refined
53308000	gr_refined
53310000	gr_refined
53310050	gr_refined
53311000	gr_refined
53312000	gr_refined
53313000	gr_refined
53314000	gr_refined
53341000	gr_refined
53341500	gr_refined
53341750	gr_refined
53342000	gr_refined
53343000	gr_refined
53344000	gr_refined
53344070	gr_refined
53344200	gr_refined
53344300	gr_refined
53346000	gr_refined
53346500	gr_refined
53347000	gr_refined
53347070	gr_refined
53347600	gr_refined
53348000	gr_refined
53348070	gr_refined
53360000	gr_refined
53365000	gr_refined
53381000	gr_refined
53381070	gr_refined
53385000	gr_refined
53385500	gr_refined
53386000	gr_refined
53387000	gr_refined
53390000	gr_refined
53391000	gr_refined
53391100	gr_refined
53400200	gr_refined
53410100	gr_refined
53410300	gr_refined
53410500	gr_refined
53410800	gr_refined
53410900	gr_refined
53415100	gr_refined
53415120	gr_refined
53415200	gr_refined
53415220	gr_refined
53420000	gr_refined
53420100	gr_refined
53420200	gr_refined
53420300	gr_refined
53420310	gr_refined
53420400	gr_refined
53430000	gr_refined
53430100	gr_refined
53430200	gr_refined
53430700	gr_refined
53440000	gr_refined
53440300	gr_refined
53440500	gr_refined
53440800	gr_refined
53441110	gr_refined
53441210	gr_refined
53450000	gr_refined
53450300	gr_refined
53450500	gr_refined
53451000	gr_refined
53451500	gr_refined
53452100	gr_refined
53452120	gr_refined
53452130	gr_refined
53452200	gr_refined
53452400	gr_refined
53452420	gr_refined
53452450	gr_refined
53452500	gr_refined
53453150	gr_refined
53453170	gr_refined
53510000	gr_refined
53510100	gr_refined
53511000	gr_refined
53520000	gr_refined
53520100	gr_refined
53520110	gr_refined
53520120	gr_refined
53520130	gr_refined
53520135	gr_refined
53520140	gr_refined
53520160	gr_refined
53520170	gr_refined
53520200	gr_refined
53520510	gr_refined
53520600	gr_refined
53521100	gr_refined
53521110	gr_refined
53521120	gr_refined
53521130	gr_refined
53521140	gr_refined
53521210	gr_refined
53521230	gr_refined
53530000	gr_refined
53530010	gr_refined
53610100	gr_refined
53610170	gr_refined
53610200	gr_refined
53710500	gr_refined
53710502	gr_refined
53710600	gr_refined
53710700	gr_refined
53710810	gr_refined
53713010	gr_refined
53714220	gr_refined
53714250	gr_refined
53714400	gr_refined
53714500	gr_refined
53714520	gr_refined
53720200	gr_refined
53720210	gr_refined
53720300	gr_refined
53720400	gr_refined
53720600	gr_refined
53720700	gr_refined
53720800	gr_refined
53729000	gr_refined
53801000	gr_refined
53803050	gr_refined
53803250	gr_refined
53803300	gr_refined
54001000	gr_refined
54102010	gr_refined
54102015	gr_refined
54102020	gr_refined
54102050	gr_refined
54102060	gr_refined
54102100	gr_refined
54102200	gr_refined
54103000	gr_refined
54200100	gr_refined
54201010	gr_refined
54202020	gr_refined
54204020	gr_refined
54204030	gr_refined
54301010	gr_refined
54301020	gr_refined
54301030	gr_refined
54301100	gr_refined
54304000	gr_refined
54304005	gr_refined
54304020	gr_refined
54304100	gr_refined
54304110	gr_refined
54304150	gr_refined
54307000	gr_refined
54308000	gr_refined
54313000	gr_refined
54319000	gr_refined
54319005	gr_refined
54319500	gr_refined
54325000	gr_refined
54325010	gr_refined
54325060	gr_refined
54326000	gr_refined
54328000	gr_refined
54328100	gr_refined
54328105	gr_refined
54328110	gr_refined
54328120	gr_refined
54328200	gr_refined
54328210	gr_refined
54336000	gr_refined
54336100	gr_refined
54337010	gr_refined
54337020	gr_refined
54337030	gr_refined
54337060	gr_refined
54338000	gr_refined
54338010	gr_refined
54338020	gr_refined
54338100	gr_refined
54339000	gr_refined
54350000	gr_refined
54350010	gr_refined
54350020	gr_refined
54360000	gr_refined
54401055	gr_refined
54401065	gr_refined
54401075	gr_refined
54401081	gr_refined
54401085	gr_refined
54401110	gr_refined
54401111	gr_refined
54401112	gr_refined
54401121	gr_refined
54401122	gr_refined
54401170	gr_refined
54402080	gr_refined
54402200	gr_refined
54402700	gr_refined
54404000	gr_refined
54404010	gr_refined
54404020	gr_refined
54406010	gr_refined
54406200	gr_refined
54408000	gr_refined
54408015	gr_refined
54408016	gr_refined
54408017	gr_refined
54408030	gr_refined
54408035	gr_refined
54408070	gr_refined
54408081	gr_refined
54408082	gr_refined
54408105	gr_refined
54408110	gr_refined
54408190	gr_refined
54408200	gr_refined
54408210	gr_refined
54408250	gr_refined
54408290	gr_refined
54408300	gr_refined
54408310	gr_refined
54408400	gr_refined
54408405	gr_refined
54408410	gr_refined
54408411	gr_refined
54408415	gr_refined
54408416	gr_refined
54408420	gr_refined
54408422	gr_refined
54408430	gr_refined
54408432	gr_refined
54408456	gr_refined
54408470	gr_refined
54408475	gr_refined
54408480	gr_refined
54408485	gr_refined
54408487	gr_refined
54420220	gr_refined
54440010	gr_refined
55100005	gr_refined
55100010	gr_refined
55100015	gr_refined
55100020	gr_refined
55100025	gr_refined
55100030	gr_refined
55100035	gr_refined
55100050	gr_refined
55100055	gr_refined
55100060	gr_refined
55100080	gr_refined
55101000	gr_refined
55101015	gr_refined
55103000	gr_refined
55103020	gr_refined
55103100	gr_refined
55105100	gr_refined
55200010	gr_refined
55200020	gr_refined
55200030	gr_refined
55200040	gr_refined
55200050	gr_refined
55200060	gr_refined
55200070	gr_refined
55200100	gr_refined
55200110	gr_refined
55200120	gr_refined
55200200	gr_refined
55201000	gr_refined
55203000	gr_refined
55203600	gr_refined
55203700	gr_refined
55204000	gr_refined
55211050	gr_refined
55300010	gr_refined
55300020	gr_refined
55300050	gr_refined
55301000	gr_refined
55301030	gr_refined
55301031	gr_refined
55301040	gr_refined
55301050	gr_refined
55310100	gr_refined
55401000	gr_refined
55501000	gr_refined
55502000	gr_refined
55610300	gr_refined
55701000	gr_refined
55702000	gr_refined
55702100	gr_refined
55703000	gr_refined
55801000	gr_refined
55801010	gr_refined
56104000	gr_refined
56112000	gr_refined
56113990	gr_refined
56116000	gr_refined
56117090	gr_refined
56130000	gr_refined
56140100	gr_refined
56200390	gr_refined
56200400	gr_refined
56200990	gr_refined
56201000	gr_refined
56201040	gr_refined
56201050	gr_refined
56201051	gr_refined
56201052	gr_refined
56201055	gr_refined
56201056	gr_refined
56201057	gr_refined
56201090	gr_refined
56201091	gr_refined
56201092	gr_refined
56201210	gr_refined
56201220	gr_refined
56201340	gr_refined
56201342	gr_refined
56201360	gr_refined
56201515	gr_refined
56201516	gr_refined
56201517	gr_refined
56201540	gr_refined
56201550	gr_refined
56201600	gr_refined
56205000	gr_refined
56205001	gr_refined
56205002	gr_refined
56205004	gr_refined
56205006	gr_refined
56205007	gr_refined
56205008	gr_refined
56205050	gr_refined
56205060	gr_refined
56205070	gr_refined
56205080	gr_refined
56205090	gr_refined
56205092	gr_refined
56205101	gr_refined
56205130	gr_refined
56205150	gr_refined
56205170	gr_refined
56205190	gr_refined
56205300	gr_refined
56205320	gr_refined
56205330	gr_refined
56207005	gr_refined
56207016	gr_refined
56207017	gr_refined
56207022	gr_refined
56207023	gr_refined
56207027	gr_refined
56207030	gr_refined
56207060	gr_refined
56207094	gr_refined
56207095	gr_refined
56207102	gr_refined
56207160	gr_refined
56208500	gr_refined
56208510	gr_refined
56208520	gr_refined
57101000	gr_refined
57106100	gr_refined
57110000	gr_refined
57117000	gr_refined
57117500	gr_refined
57119000	gr_refined
57120000	gr_refined
57126000	gr_refined
57127000	gr_refined
57134000	gr_refined
57135000	gr_refined
57143000	gr_refined
57148000	gr_refined
57148500	gr_refined
57151000	gr_refined
57201900	gr_refined
57206700	gr_refined
57209000	gr_refined
57218000	gr_refined
57223000	gr_refined
57237100	gr_refined
57237300	gr_refined
57237900	gr_refined
57238000	gr_refined
57243000	gr_refined
57301510	gr_refined
57303200	gr_refined
57305170	gr_refined
57305174	gr_refined
57305175	gr_refined
57305180	gr_refined
57305200	gr_refined
57305210	gr_refined
57305300	gr_refined
57306130	gr_refined
57306500	gr_refined
57306800	gr_refined
57316710	gr_refined
57326000	gr_refined
57327450	gr_refined
57329000	gr_refined
57336000	gr_refined
57337000	gr_refined
57339000	gr_refined
57339500	gr_refined
57340000	gr_refined
57344000	gr_refined
57344001	gr_refined
57344005	gr_refined
57344010	gr_refined
57344020	gr_refined
57344025	gr_refined
57347000	gr_refined
57348000	gr_refined
57349000	gr_refined
57355000	gr_refined
57412000	gr_refined
57416010	gr_refined
57601100	gr_refined
57602500	gr_refined
57801000	gr_refined
57803000	gr_refined
57805000	gr_refined
57805080	gr_refined
57820100	gr_refined
57822000	gr_refined
57824000	gr_refined
57824500	gr_refined
57830100	gr_refined
58100000	gr_refined
58100005	gr_refined
58100010	gr_refined
58100013	gr_refined
58100015	gr_refined
58100017	gr_refined
58100020	gr_refined
58100100	gr_refined
58100120	gr_refined
58100125	gr_refined
58100135	gr_refined
58100140	gr_refined
58100145	gr_refined
58100160	gr_refined
58100165	gr_refined
58100200	gr_refined
58100220	gr_refined
58100235	gr_refined
58100245	gr_refined
58100255	gr_refined
58100260	gr_refined
58100300	gr_refined
58100320	gr_refined
58100325	gr_refined
58100330	gr_refined
58100360	gr_refined
58100370	gr_refined
58100500	gr_refined
58100520	gr_refined
58100525	gr_refined
58100530	gr_refined
58100535	gr_refined
58100620	gr_refined
58100625	gr_refined
58100630	gr_refined
58100635	gr_refined
58100720	gr_refined
58100725	gr_refined
58100800	gr_refined
58100805	gr_refined
58101320	gr_refined
58101323	gr_refined
58101325	gr_refined
58101345	gr_refined
58101347	gr_refined
58101350	gr_refined
58101357	gr_refined
58101450	gr_refined
58101457	gr_refined
58101460	gr_refined
58101520	gr_refined
58101525	gr_refined
58101540	gr_refined
58101555	gr_refined
58101610	gr_refined
58101615	gr_refined
58101620	gr_refined
58101625	gr_refined
58101630	gr_refined
58101635	gr_refined
58101720	gr_refined
58101725	gr_refined
58101730	gr_refined
58101733	gr_refined
58101735	gr_refined
58101745	gr_refined
58101750	gr_refined
58101800	gr_refined
58101930	gr_refined
58101935	gr_refined
58101940	gr_refined
58101945	gr_refined
58101950	gr_refined
58101955	gr_refined
58103120	gr_refined
58103130	gr_refined
58103250	gr_refined
58103310	gr_refined
58104090	gr_refined
58104120	gr_refined
58104130	gr_refined
58104150	gr_refined
58104160	gr_refined
58104180	gr_refined
58104190	gr_refined
58104260	gr_refined
58104270	gr_refined
58104280	gr_refined
58104290	gr_refined
58104320	gr_refined
58104340	gr_refined
58104500	gr_refined
58104520	gr_refined
58104530	gr_refined
58104535	gr_refined
58104550	gr_refined
58104710	gr_refined
58104720	gr_refined
58104730	gr_refined
58104740	gr_refined
58104745	gr_refined
58104750	gr_refined
58104760	gr_refined
58104770	gr_refined
58104800	gr_refined
58104820	gr_refined
58104825	gr_refined
58104830	gr_refined
58104835	gr_refined
58104900	gr_refined
58104905	gr_refined
58105000	gr_refined
58105050	gr_refined
58105075	gr_refined
58105100	gr_refined
58105105	gr_refined
58105110	gr_refined
58106200	gr_refined
58106205	gr_refined
58106210	gr_refined
58106220	gr_refined
58106225	gr_refined
58106230	gr_refined
58106233	gr_refined
58106250	gr_refined
58106260	gr_refined
58106300	gr_refined
58106305	gr_refined
58106320	gr_refined
58106325	gr_refined
58106330	gr_refined
58106345	gr_refined
58106347	gr_refined
58106358	gr_refined
58106359	gr_refined
58106360	gr_refined
58106512	gr_refined
58106514	gr_refined
58106516	gr_refined
58106540	gr_refined
58106550	gr_refined
58106555	gr_refined
58106560	gr_refined
58106565	gr_refined
58106602	gr_refined
58106604	gr_refined
58106606	gr_refined
58106610	gr_refined
58106620	gr_refined
58106625	gr_refined
58106630	gr_refined
58106633	gr_refined
58106650	gr_refined
58106655	gr_refined
58106660	gr_refined
58106700	gr_refined
58106702	gr_refined
58106705	gr_refined
58106720	gr_refined
58106725	gr_refined
58106730	gr_refined
58106736	gr_refined
58106737	gr_refined
58106738	gr_refined
58106750	gr_refined
58106755	gr_refined
58106760	gr_refined
58106830	gr_refined
58107050	gr_refined
58107205	gr_refined
58107212	gr_refined
58107222	gr_refined
58107224	gr_refined
58107232	gr_refined
58108000	gr_refined
58108010	gr_refined
58108050	gr_refined
58109015	gr_refined
58109020	gr_refined
58109030	gr_refined
58109040	gr_refined
58109050	gr_refined
58109060	gr_refined
58109210	gr_refined
58110110	gr_refined
58110120	gr_refined
58110130	gr_refined
58110170	gr_refined
58110200	gr_refined
58111110	gr_refined
58111120	gr_refined
58111130	gr_refined
58111200	gr_refined
58112510	gr_refined
58116110	gr_refined
58116115	gr_refined
58116120	gr_refined
58116130	gr_refined
58116210	gr_refined
58116310	gr_refined
58117110	gr_refined
58117410	gr_refined
58117510	gr_refined
58120110	gr_refined
58120120	gr_refined
58121510	gr_refined
58121610	gr_refined
58121620	gr_refined
58122210	gr_refined
58122220	gr_refined
58122320	gr_refined
58122330	gr_refined
58123110	gr_refined
58123120	gr_refined
58124210	gr_refined
58124220	gr_refined
58124230	gr_refined
58124250	gr_refined
58124500	gr_refined
58125110	gr_refined
58125120	gr_refined
58125180	gr_refined
58126000	gr_refined
58126110	gr_refined
58126130	gr_refined
58126150	gr_refined
58126160	gr_refined
58126170	gr_refined
58126180	gr_refined
58126270	gr_refined
58126280	gr_refined
58126300	gr_refined
58126400	gr_refined
58127150	gr_refined
58127210	gr_refined
58127270	gr_refined
58127290	gr_refined
58127310	gr_refined
58127330	gr_refined
58127350	gr_refined
58127500	gr_refined
58128000	gr_refined
58128120	gr_refined
58128210	gr_refined
58128220	gr_refined
58128250	gr_refined
58130011	gr_refined
58130013	gr_refined
58130014	gr_refined
58130015	gr_refined
58130016	gr_refined
58130020	gr_refined
58130140	gr_refined
58130150	gr_refined
58130310	gr_refined
58130320	gr_refined
58131110	gr_refined
58131120	gr_refined
58131310	gr_refined
58131320	gr_refined
58131323	gr_refined
58131330	gr_refined
58131510	gr_refined
58131520	gr_refined
58131523	gr_refined
58131535	gr_refined
58131590	gr_refined
58131600	gr_refined
58131610	gr_refined
58133120	gr_refined
58134120	gr_refined
58134130	gr_refined
58134160	gr_refined
58134310	gr_refined
58134610	gr_refined
58134613	gr_refined
58134620	gr_refined
58134640	gr_refined
58134650	gr_refined
58134660	gr_refined
58134680	gr_refined
58134710	gr_refined
58134720	gr_refined
58135110	gr_refined
58135120	gr_refined
58136120	gr_refined
58136130	gr_refined
58136140	gr_refined
58136150	gr_refined
58136160	gr_refined
58137220	gr_refined
58137230	gr_refined
58137240	gr_refined
58137250	gr_refined
58137300	gr_refined
58145110	gr_refined
58145111	gr_refined
58145112	gr_refined
58145113	gr_refined
58145117	gr_refined
58145119	gr_refined
58145120	gr_refined
58145135	gr_refined
58145136	gr_refined
58145140	gr_refined
58145160	gr_refined
58145170	gr_refined
58145190	gr_refined
58146120	gr_refined
58146150	gr_refined
58146160	gr_refined
58146210	gr_refined
58146221	gr_refined
58146222	gr_refined
58146223	gr_refined
58146301	gr_refined
58146302	gr_refined
58146303	gr_refined
58146321	gr_refined
58146322	gr_refined
58146323	gr_refined
58146331	gr_refined
58146332	gr_refined
58146333	gr_refined
58146341	gr_refined
58146342	gr_refined
58146343	gr_refined
58146351	gr_refined
58146352	gr_refined
58146353	gr_refined
58146361	gr_refined
58146362	gr_refined
58146363	gr_refined
58146371	gr_refined
58146372	gr_refined
58146373	gr_refined
58146381	gr_refined
58146382	gr_refined
58146383	gr_refined
58146391	gr_refined
58146392	gr_refined
58146393	gr_refined
58146401	gr_refined
58146402	gr_refined
58146403	gr_refined
58146411	gr_refined
58146412	gr_refined
58146413	gr_refined
58146421	gr_refined
58146422	gr_refined
58146423	gr_refined
58146431	gr_refined
58146432	gr_refined
58146433	gr_refined
58146441	gr_refined
58146442	gr_refined
58146443	gr_refined
58146451	gr_refined
58146452	gr_refined
58147330	gr_refined
58147340	gr_refined
58147510	gr_refined
58148110	gr_refined
58148111	gr_refined
58148112	gr_refined
58148114	gr_refined
58148117	gr_refined
58148118	gr_refined
58148120	gr_refined
58148130	gr_refined
58148150	gr_refined
58148160	gr_refined
58148170	gr_refined
58148180	gr_refined
58148550	gr_refined
58150100	gr_refined
58150110	gr_refined
58150310	gr_refined
58150320	gr_refined
58150330	gr_refined
58150340	gr_refined
58150510	gr_refined
58150520	gr_refined
58150530	gr_refined
58151100	gr_refined
58151170	gr_refined
58151180	gr_refined
58151190	gr_refined
58151200	gr_refined
58151210	gr_refined
58151220	gr_refined
58151230	gr_refined
58151400	gr_refined
58151410	gr_refined
58151420	gr_refined
58151430	gr_refined
58151440	gr_refined
58151450	gr_refined
58157210	gr_refined
58157300	gr_refined
58157310	gr_refined
58157320	gr_refined
58160000	gr_refined
58160100	gr_refined
58160102	gr_refined
58160104	gr_refined
58160106	gr_refined
58160110	gr_refined
58160120	gr_refined
58160130	gr_refined
58160132	gr_refined
58160135	gr_refined
58160140	gr_refined
58160150	gr_refined
58160154	gr_refined
58160156	gr_refined
58160400	gr_refined
58160410	gr_refined
58160420	gr_refined
58160430	gr_refined
58160440	gr_refined
58160450	gr_refined
58160460	gr_refined
58160470	gr_refined
58160480	gr_refined
58160490	gr_refined
58160500	gr_refined
58160510	gr_refined
58160520	gr_refined
58160530	gr_refined
58160540	gr_refined
58160550	gr_refined
58160560	gr_refined
58160570	gr_refined
58160580	gr_refined
58160600	gr_refined
58160610	gr_refined
58160620	gr_refined
58160630	gr_refined
58160640	gr_refined
58160660	gr_refined
58160670	gr_refined
58160690	gr_refined
58160700	gr_refined
58160710	gr_refined
58160720	gr_refined
58160800	gr_refined
58160805	gr_refined
58160810	gr_refined
58161200	gr_refined
58161510	gr_refined
58162090	gr_refined
58162110	gr_refined
58162120	gr_refined
58162140	gr_refined
58162310	gr_refined
58163130	gr_refined
58163310	gr_refined
58163330	gr_refined
58163380	gr_refined
58163405	gr_refined
58163410	gr_refined
58163420	gr_refined
58163430	gr_refined
58163450	gr_refined
58163510	gr_refined
58164110	gr_refined
58164500	gr_refined
58164510	gr_refined
58164520	gr_refined
58164530	gr_refined
58164540	gr_refined
58164550	gr_refined
58164560	gr_refined
58164570	gr_refined
58164580	gr_refined
58165000	gr_refined
58165010	gr_refined
58165020	gr_refined
58165030	gr_refined
58165040	gr_refined
58165060	gr_refined
58165070	gr_refined
58165080	gr_refined
58174000	gr_refined
58174100	gr_refined
58200250	gr_refined
58201005	gr_refined
58201035	gr_refined
58301050	gr_refined
58301110	gr_refined
58302000	gr_refined
58302050	gr_refined
58302080	gr_refined
58303100	gr_refined
58304010	gr_refined
58304060	gr_refined
58304200	gr_refined
58305250	gr_refined
58306020	gr_refined
58306070	gr_refined
58306100	gr_refined
58310210	gr_refined
58310310	gr_refined
58400000	gr_refined
58400100	gr_refined
58400200	gr_refined
58401010	gr_refined
58401200	gr_refined
58402010	gr_refined
58402100	gr_refined
58403010	gr_refined
58403040	gr_refined
58403050	gr_refined
58403060	gr_refined
58404010	gr_refined
58404030	gr_refined
58404040	gr_refined
58404100	gr_refined
58404500	gr_refined
58404510	gr_refined
58404520	gr_refined
58407010	gr_refined
58407030	gr_refined
58407035	gr_refined
58408010	gr_refined
58408500	gr_refined
58409000	gr_refined
58421010	gr_refined
58421020	gr_refined
58421060	gr_refined
58421080	gr_refined
58503010	gr_refined
58503050	gr_refined
58508000	gr_refined
58508300	gr_refined
58509020	gr_refined
58509100	gr_refined
51102010	gr_whole
51300050	gr_whole
51300060	gr_whole
51300110	gr_whole
51300120	gr_whole
51300140	gr_whole
51300150	gr_whole
51300210	gr_whole
51300220	gr_whole
51301540	gr_whole
51301550	gr_whole
51301600	gr_whole
51301620	gr_whole
51306000	gr_whole
51320550	gr_whole
51320560	gr_whole
51320700	gr_whole
51320710	gr_whole
51320720	gr_whole
51601010	gr_whole
51601020	gr_whole
51601210	gr_whole
51806010	gr_whole
51807000	gr_whole
51808000	gr_whole
51808010	gr_whole
51808050	gr_whole
51808100	gr_whole
52104040	gr_whole
52215260	gr_whole
52303010	gr_whole
53223100	gr_whole
53231400	gr_whole
53710400	gr_whole
53710504	gr_whole
53710800	gr_whole
53710802	gr_whole
53710900	gr_whole
53710902	gr_whole
53710904	gr_whole
53710906	gr_whole
53711000	gr_whole
53711002	gr_whole
53711004	gr_whole
53711006	gr_whole
53711100	gr_whole
53712000	gr_whole
53712100	gr_whole
53712200	gr_whole
53712210	gr_whole
53713100	gr_whole
53714200	gr_whole
53714210	gr_whole
53714230	gr_whole
53714300	gr_whole
53720610	gr_whole
53803100	gr_whole
54305010	gr_whole
54305020	gr_whole
54318000	gr_whole
54318500	gr_whole
54319020	gr_whole
54340100	gr_whole
54340110	gr_whole
54401011	gr_whole
54401021	gr_whole
54401026	gr_whole
54401031	gr_whole
54401035	gr_whole
54401090	gr_whole
54403001	gr_whole
54403005	gr_whole
54403006	gr_whole
54403010	gr_whole
54403040	gr_whole
54403045	gr_whole
54403046	gr_whole
54403051	gr_whole
54403052	gr_whole
54403053	gr_whole
54403054	gr_whole
54403055	gr_whole
54403056	gr_whole
54403057	gr_whole
54403058	gr_whole
54403059	gr_whole
54403061	gr_whole
54403062	gr_whole
54403080	gr_whole
54403081	gr_whole
54403082	gr_whole
54403083	gr_whole
54403085	gr_whole
54403086	gr_whole
54403087	gr_whole
54403088	gr_whole
54403089	gr_whole
54403091	gr_whole
54403092	gr_whole
54403110	gr_whole
54403120	gr_whole
54403160	gr_whole
54420210	gr_whole
54440020	gr_whole
55100040	gr_whole
55100065	gr_whole
55105000	gr_whole
55105200	gr_whole
55105205	gr_whole
55106000	gr_whole
55200080	gr_whole
55200090	gr_whole
55200130	gr_whole
55205000	gr_whole
55208000	gr_whole
55212000	gr_whole
55300055	gr_whole
55300060	gr_whole
55301015	gr_whole
55301020	gr_whole
55301025	gr_whole
55301048	gr_whole
55301055	gr_whole
56113000	gr_whole
56132990	gr_whole
56200300	gr_whole
56200490	gr_whole
56200500	gr_whole
56200510	gr_whole
56202000	gr_whole
56202100	gr_whole
56202900	gr_whole
56202905	gr_whole
56202910	gr_whole
56202920	gr_whole
56202960	gr_whole
56203000	gr_whole
56203055	gr_whole
56203056	gr_whole
56203057	gr_whole
56203065	gr_whole
56203066	gr_whole
56203067	gr_whole
56203075	gr_whole
56203076	gr_whole
56203077	gr_whole
56203086	gr_whole
56203087	gr_whole
56203096	gr_whole
56203097	gr_whole
56203106	gr_whole
56203125	gr_whole
56203130	gr_whole
56203135	gr_whole
56203150	gr_whole
56203155	gr_whole
56203160	gr_whole
56203175	gr_whole
56203180	gr_whole
56203510	gr_whole
56203550	gr_whole
56203555	gr_whole
56203560	gr_whole
56203600	gr_whole
56203610	gr_whole
56203620	gr_whole
56204000	gr_whole
56204005	gr_whole
56204010	gr_whole
56205011	gr_whole
56205012	gr_whole
56205014	gr_whole
56205016	gr_whole
56205017	gr_whole
56205018	gr_whole
56205205	gr_whole
56205210	gr_whole
56205215	gr_whole
56205230	gr_whole
56205340	gr_whole
56205350	gr_whole
56207110	gr_whole
56207120	gr_whole
56207130	gr_whole
56207200	gr_whole
56207210	gr_whole
56207370	gr_whole
57000100	gr_whole
57100100	gr_whole
57103000	gr_whole
57103100	gr_whole
57104000	gr_whole
57106050	gr_whole
57106060	gr_whole
57106250	gr_whole
57106260	gr_whole
57107000	gr_whole
57123000	gr_whole
57124030	gr_whole
57124050	gr_whole
57124100	gr_whole
57124200	gr_whole
57124300	gr_whole
57125000	gr_whole
57125010	gr_whole
57125900	gr_whole
57128000	gr_whole
57128005	gr_whole
57130000	gr_whole
57132000	gr_whole
57137000	gr_whole
57139000	gr_whole
57143500	gr_whole
57206710	gr_whole
57206715	gr_whole
57207000	gr_whole
57208000	gr_whole
57211000	gr_whole
57213000	gr_whole
57213010	gr_whole
57213850	gr_whole
57214000	gr_whole
57221700	gr_whole
57221810	gr_whole
57224000	gr_whole
57227000	gr_whole
57228000	gr_whole
57229000	gr_whole
57229500	gr_whole
57230000	gr_whole
57231000	gr_whole
57231200	gr_whole
57231250	gr_whole
57237200	gr_whole
57240100	gr_whole
57241000	gr_whole
57241200	gr_whole
57301500	gr_whole
57301505	gr_whole
57301511	gr_whole
57301512	gr_whole
57301530	gr_whole
57303100	gr_whole
57303105	gr_whole
57304100	gr_whole
57305100	gr_whole
57305150	gr_whole
57305160	gr_whole
57305165	gr_whole
57305215	gr_whole
57305400	gr_whole
57305500	gr_whole
57305600	gr_whole
57306700	gr_whole
57307500	gr_whole
57308190	gr_whole
57308400	gr_whole
57309100	gr_whole
57316300	gr_whole
57316380	gr_whole
57316385	gr_whole
57316450	gr_whole
57320500	gr_whole
57321900	gr_whole
57327500	gr_whole
57330000	gr_whole
57330010	gr_whole
57331000	gr_whole
57332050	gr_whole
57332100	gr_whole
57335550	gr_whole
57341000	gr_whole
57341200	gr_whole
57341300	gr_whole
57344007	gr_whole
57344015	gr_whole
57401100	gr_whole
57406100	gr_whole
57407100	gr_whole
57407110	gr_whole
57408100	gr_whole
57410000	gr_whole
57411000	gr_whole
57416000	gr_whole
57417000	gr_whole
57418000	gr_whole
57602100	gr_whole
57804000	gr_whole
57805090	gr_whole
57806000	gr_whole
57806050	gr_whole
57806100	gr_whole
57806200	gr_whole
57807010	gr_whole
57820000	gr_whole
57823000	gr_whole
58101820	gr_whole
58101830	gr_whole
58106234	gr_whole
58106235	gr_whole
58106236	gr_whole
58106570	gr_whole
58106578	gr_whole
58106580	gr_whole
58106634	gr_whole
58106635	gr_whole
58106636	gr_whole
58109100	gr_whole
58109120	gr_whole
58109130	gr_whole
58109140	gr_whole
58109150	gr_whole
58117310	gr_whole
58126290	gr_whole
58126410	gr_whole
58145300	gr_whole
58146215	gr_whole
58146315	gr_whole
58146601	gr_whole
58146602	gr_whole
58146603	gr_whole
58146612	gr_whole
58146613	gr_whole
58146622	gr_whole
58146623	gr_whole
58146632	gr_whole
58146641	gr_whole
58146642	gr_whole
58146652	gr_whole
58146653	gr_whole
58146662	gr_whole
58146672	gr_whole
58146682	gr_whole
58146683	gr_whole
58146692	gr_whole
58146693	gr_whole
58146702	gr_whole
58146713	gr_whole
58146722	gr_whole
58146723	gr_whole
58146732	gr_whole
58146733	gr_whole
58146741	gr_whole
58161320	gr_whole
58161321	gr_whole
58161322	gr_whole
58161323	gr_whole
58161325	gr_whole
58161420	gr_whole
58161424	gr_whole
58161430	gr_whole
58161432	gr_whole
58161434	gr_whole
58161435	gr_whole
58161437	gr_whole
58161439	gr_whole
58161440	gr_whole
58161442	gr_whole
58161444	gr_whole
58161460	gr_whole
58161462	gr_whole
58161464	gr_whole
58161470	gr_whole
58161472	gr_whole
58161474	gr_whole
58161480	gr_whole
58161490	gr_whole
58161500	gr_whole
58161502	gr_whole
58161524	gr_whole
58161530	gr_whole
58161532	gr_whole
58161534	gr_whole
58163360	gr_whole
58164800	gr_whole
58164820	gr_whole
58164840	gr_whole
58165400	gr_whole
58165420	gr_whole
58165460	gr_whole
58165470	gr_whole
58165480	gr_whole
58175110	gr_whole
58201015	gr_whole
58201025	gr_whole
58201045	gr_whole
59003000	gr_whole
56116990	leg_tot
53215500	other
53225000	other
53228000	other
53720100	other
53720500	other
58103200	other
58103210	other
58175000	other
58403100	other
58402020	pf_redm
58402030	pf_redm

## Sheet: Supp Table 6.1
Food Commodity	Weighted Risk (mrh-eq per ton)
AVERAGE(Beans, green; String beans)	349.5
AVERAGE(Chicory roots; Roots and tubers nes)	297.5
AVERAGE(Flour, wheat; Flour, maize; Flour, buckwheat; Flour, rye; Flour, cereals)	104
AVERAGE(Mangoes, mangosteens, guavas; Pineapples; Avocados; Papayas)	478.25
AVERAGE(Rice, milled; Oats rolled; Fonio; Quinoa; Bulgur; Barley, pearled; Sorghum)	767.429
AVERAGE(Sesame seed; Poppy seed; Sunflower seed; Mustard seed)	1059.25
Almonds shelled	1041
Anise, badian, fennel, coriander	1343
Apples	61
Apricots	95
Apricots, dry	245
Artichokes	249
Asparagus	1182
Avocados	1159
Bananas	153
Barley	23
Barley, pearled	74
Beans, dry	201
Beans, green	444
Berries nes	215
Blueberries	527
Brazil nuts, shelled	3860
Buckwheat	94
Cabbages and other brassicas	77
Carrots and turnips	57
Cashew nuts, shelled	16224
Cauliflowers and broccoli	84
Cherries	208
Chestnut	4397
Chick peas	79
Chillies and peppers, dry	1544
Chillies and peppers, green	434
Cinnamon (cannella)	3097
Coconuts	88
Coconuts, desiccated	766
Cow peas, dry	138
Cranberries	47
Cucumbers and gherkins	239
Currants	870
Dates	670
Eggplants (aubergines)	174
Figs	100
Figs dried	428
Flour, buckwheat	266
Flour, maize	35
Flour, potatoes	144
Flour, pulses	278
Flour, rice	1340
Flour, roots and tubers nes	9436
Flour, rye	138
Flour, wheat	43
Fruit, citrus nes	59
Fruit, dried nes	3454
Fruit, fresh nes	331
Garlic	474
Ginger	3646
Grapefruit (inc. pomelos)	44
Grapes	155
Groundnuts, shelled	287
Hazelnuts, shelled	3365
Honey, natural	1182
Juice, apple, single strength	359
Juice, citrus, single strength	289
Juice, fruit nes	3046
Juice, grape	860
Juice, grapefruit	268
Juice, lemon, single strength	1694
Juice, orange, single strength	292
Juice, pineapple	624
Juice, tangerine	831
Juice, tomato	244
Kiwi fruit	196
Leeks, other alliaceous vegetables	249
Lemons and limes	238
Lentils	44
Lettuce and chicory	111
Maize	7
Mangoes, mangosteens, guavas	187
Maple sugar and syrups	110
Melons, other (inc. cantaloupes)	80
Millet	37
Mushrooms and truffles	473
None	0
Oats rolled	78
Oil, palm kernel	4253
Okra	87
Olives	91
Onions, dry	120
Oranges	64
Papayas	342
Peaches and nectarines	104
Peanut butter	504
Pears	142
Peas, dry	24
Peas, green	86
Pepper (piper spp.)	5320
Persimmons	205
Pineapples	225
Pistachios	82
Plantains and others	186
Plums and sloes	86
Plums dried (prunes)	543
Potatoes	5
Pumpkins, squash and gourds	182
Quinces	285
Quinoa	1219
Raisins	857
Rapeseed	73
Raspberries	298
Rice, husked	243
Rice, milled	153
Roots and tubers nes	572
Rye	20
Sesame seed	3536
Sorghum	7
Soybeans	48
Spices nes	1154
Spinach	111
Starch, maize	155
Strawberries	491
String beans	255
Sugar nes	1022
Sugar refined	451
Sunflower seed	95
Sweet corn	80
Sweet potatoes	16
Tangerines, mandarins, clementines, satsumas	142
Taro (cocoyam)	151
Tomatoes	215
Tomatoes, paste	736
Triticale	41
Vegetables, fresh nes	58
Walnuts, shelled	761
Watermelons	65
Wheat	9

## Sheet: Supp Table 6.2
Food Commodity	Weighted Risk (mrh-eq per ton) (WITH feed)	Weighted Risk (mrh-eq per ton) (WITHOUT feed)
AVERAGE(Meat, chicken; Meat, turkey)	397	262
Eggs, hen, in shell	239	197
Eggs, liquid	889	429
Meat, beef, dried, salted, smoked	4019	3464
Meat, cattle, boneless	2417	1782
Meat, chicken	456	321
Meat, game	316	316
Meat, pork	883	643
Meat, rabbit	2421	2286
Meat, sheep	1249	484
Meat, turkey	338	203
Milk, whole fresh cow	167	131

## Sheet: Supp Table 6.3
Food Commodity	Weighted Risk (mrh-eq per ton) (WITH feed)	Weighted Risk (mrh-eq per ton) (WITHOUT feed)
Aquatic animals	440	440
Cephalopods, average	5846	5846
Cephalopods, canned	3334	3334
Cephalopods, cured	9605	9605
Crustaceans, average (excluding shrimps)	6158	5812
Crustaceans, average (shrimps)	4136	3132
Crustaceans, cured (shrimps)	4967	4419
Demersal, average	1306	1306
Demersal, cured	4618	4618
Freshwater, average (excluding tilapia)	751	737
Freshwater, average (tilapia)	229	225
Freshwater, canned (excluding tilapia)	578	567
Freshwater, cured (excluding tilapia)	1080	1072
Molluscs, average	2043	2012
Molluscs, canned	2263	2220
Molluscs, cured	1110	1072
Pelagic, average (excluding tuna)	996	996
Pelagic, average (tuna)	1406	1406
Pelagic, canned (excluding tuna)	1567	1567
Pelagic, canned (tuna)	1214	1214
Pelagic, cured (excluding tuna)	1089	1089
Pelagic, cured (tuna)	331	331
Unspecified fish	1674.14	1414.46

[truncated: 3 more sheets: Supp Table 7, Supp Table 8, Supp Table 9]
